# Supplementary figures and images for: Unsupervised machine learning reveals key immune cell subsets in COVID-19, rhinovirus infection, and cancer therapy
Source: PubMed Central journal article supplement — bioRxiv. 2020 Nov 4:2020.07.31.190454. Originally published 2020 Aug 1. Preprint. [Version 2] doi: 10.1101/2020.07.31.190454 (PMC7402038; doi:10.1101/2020.07.31.190454), 2020-11-04

A

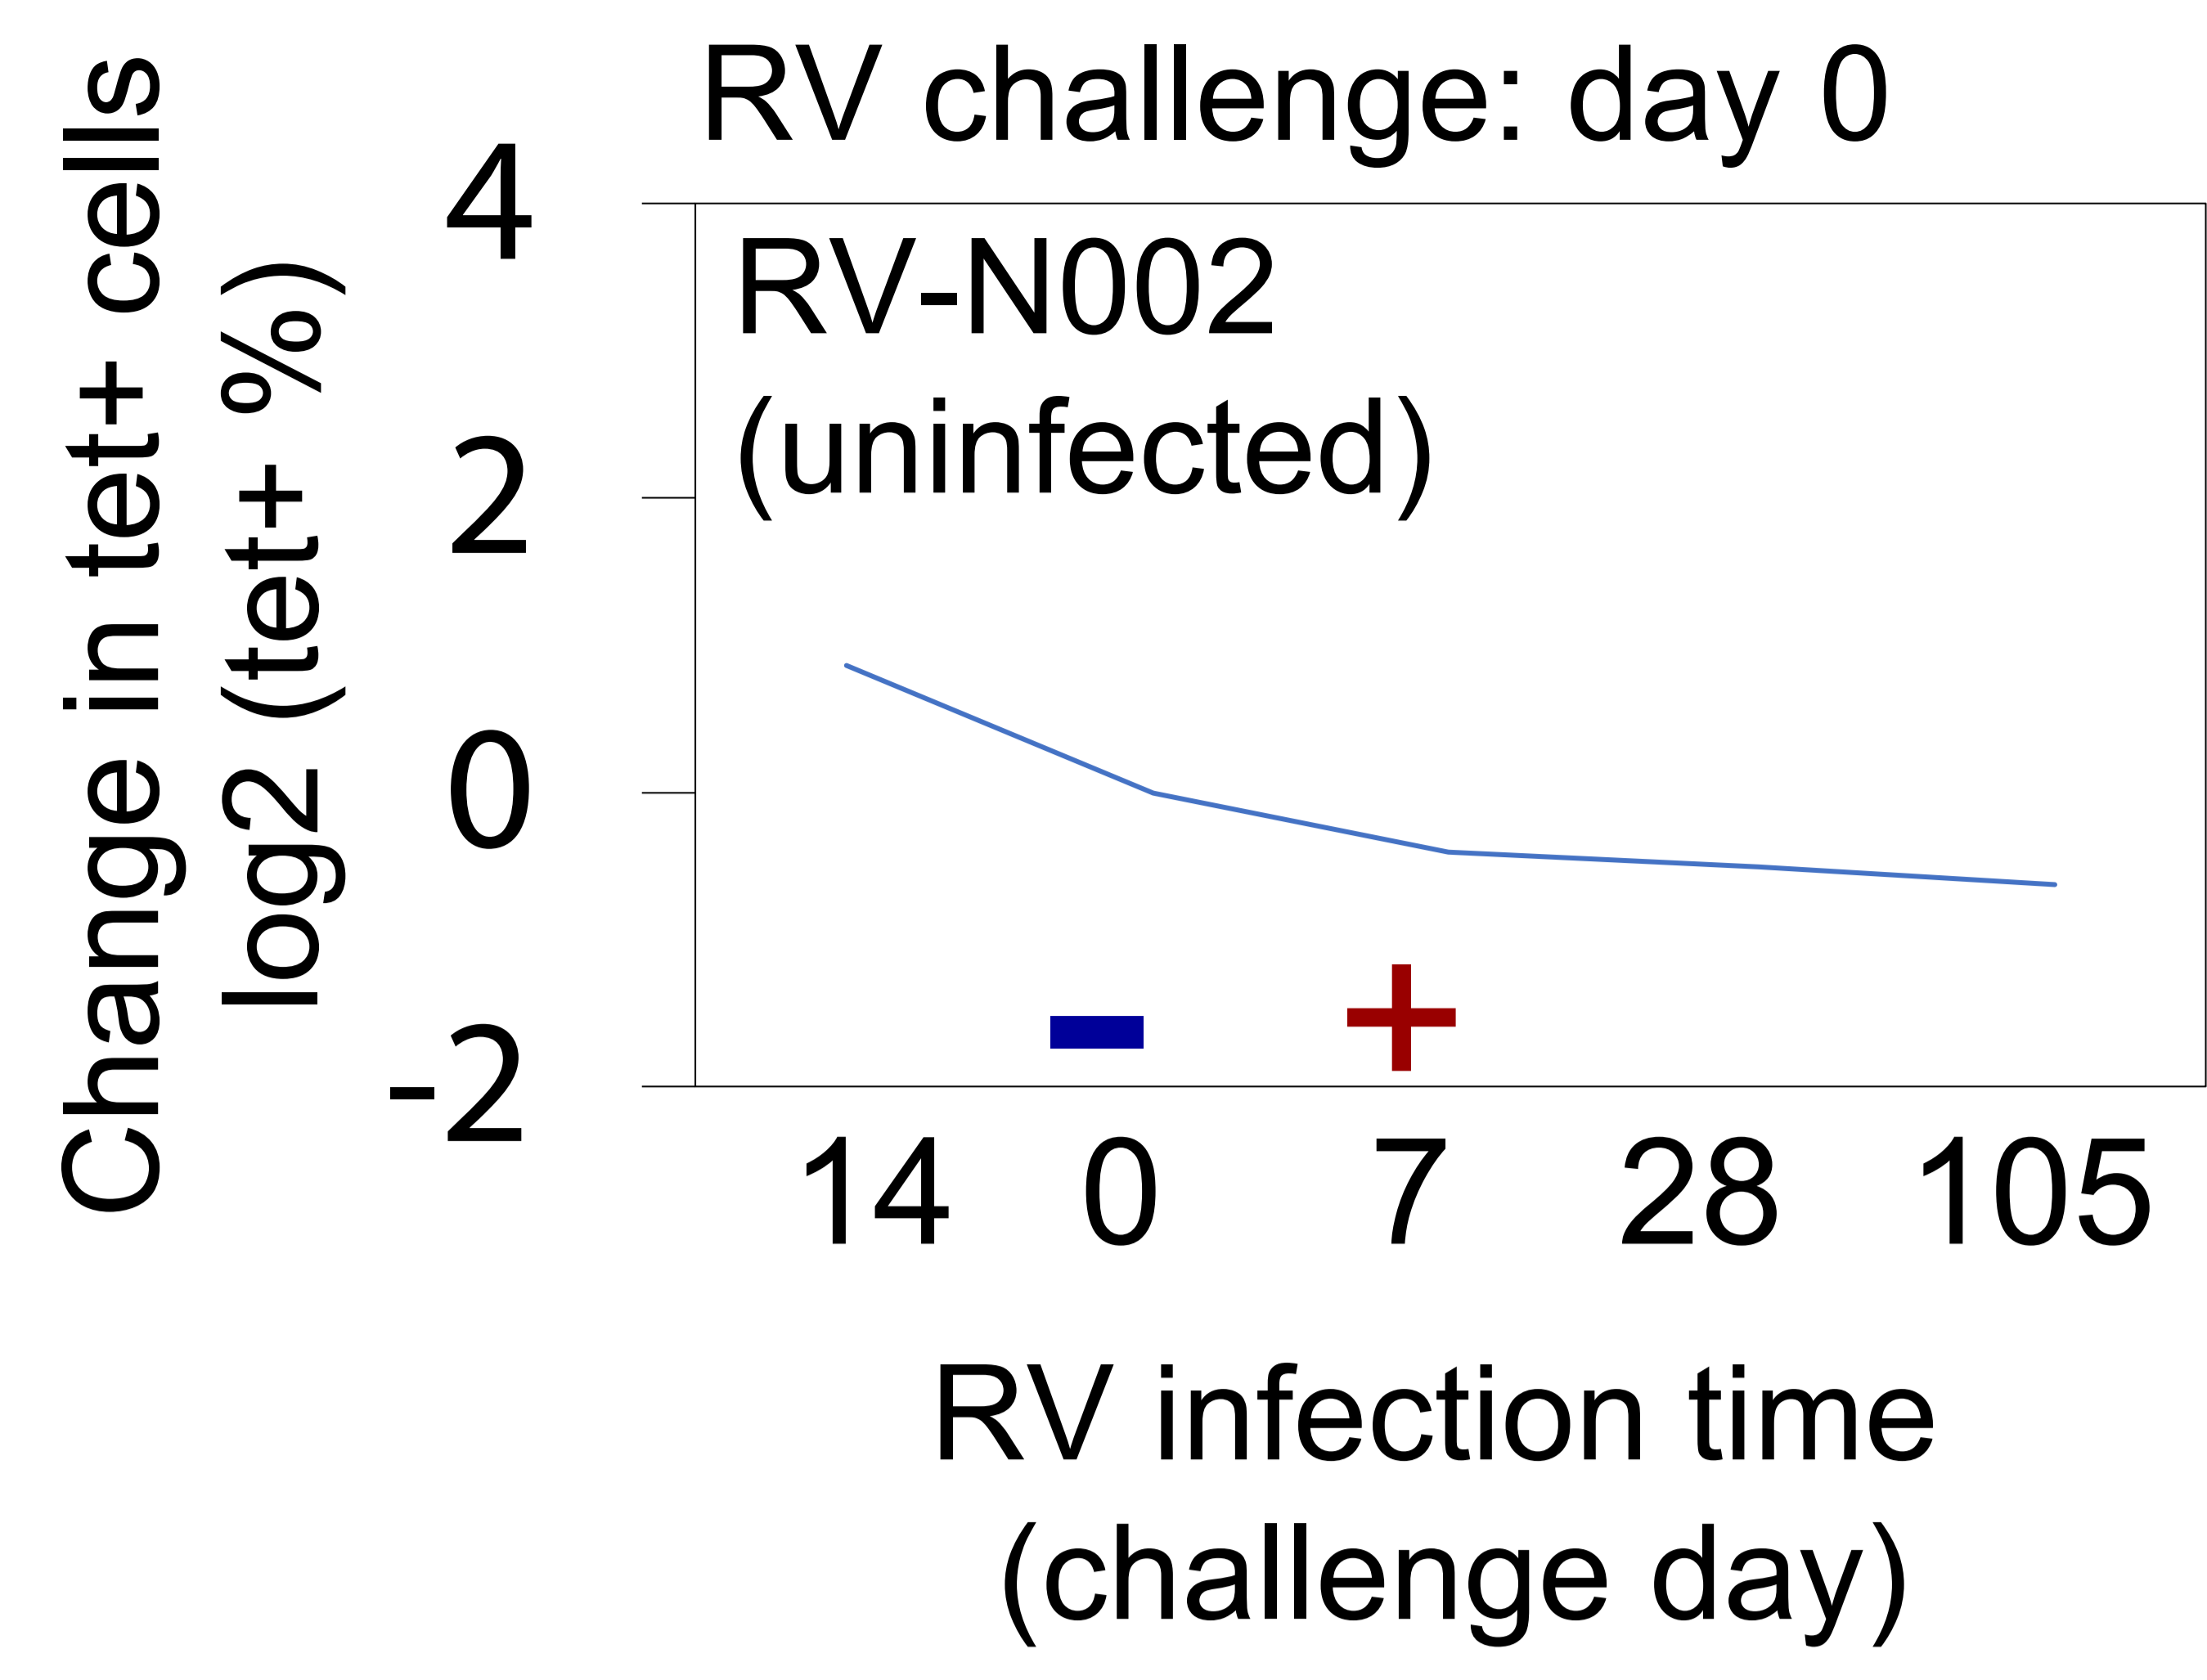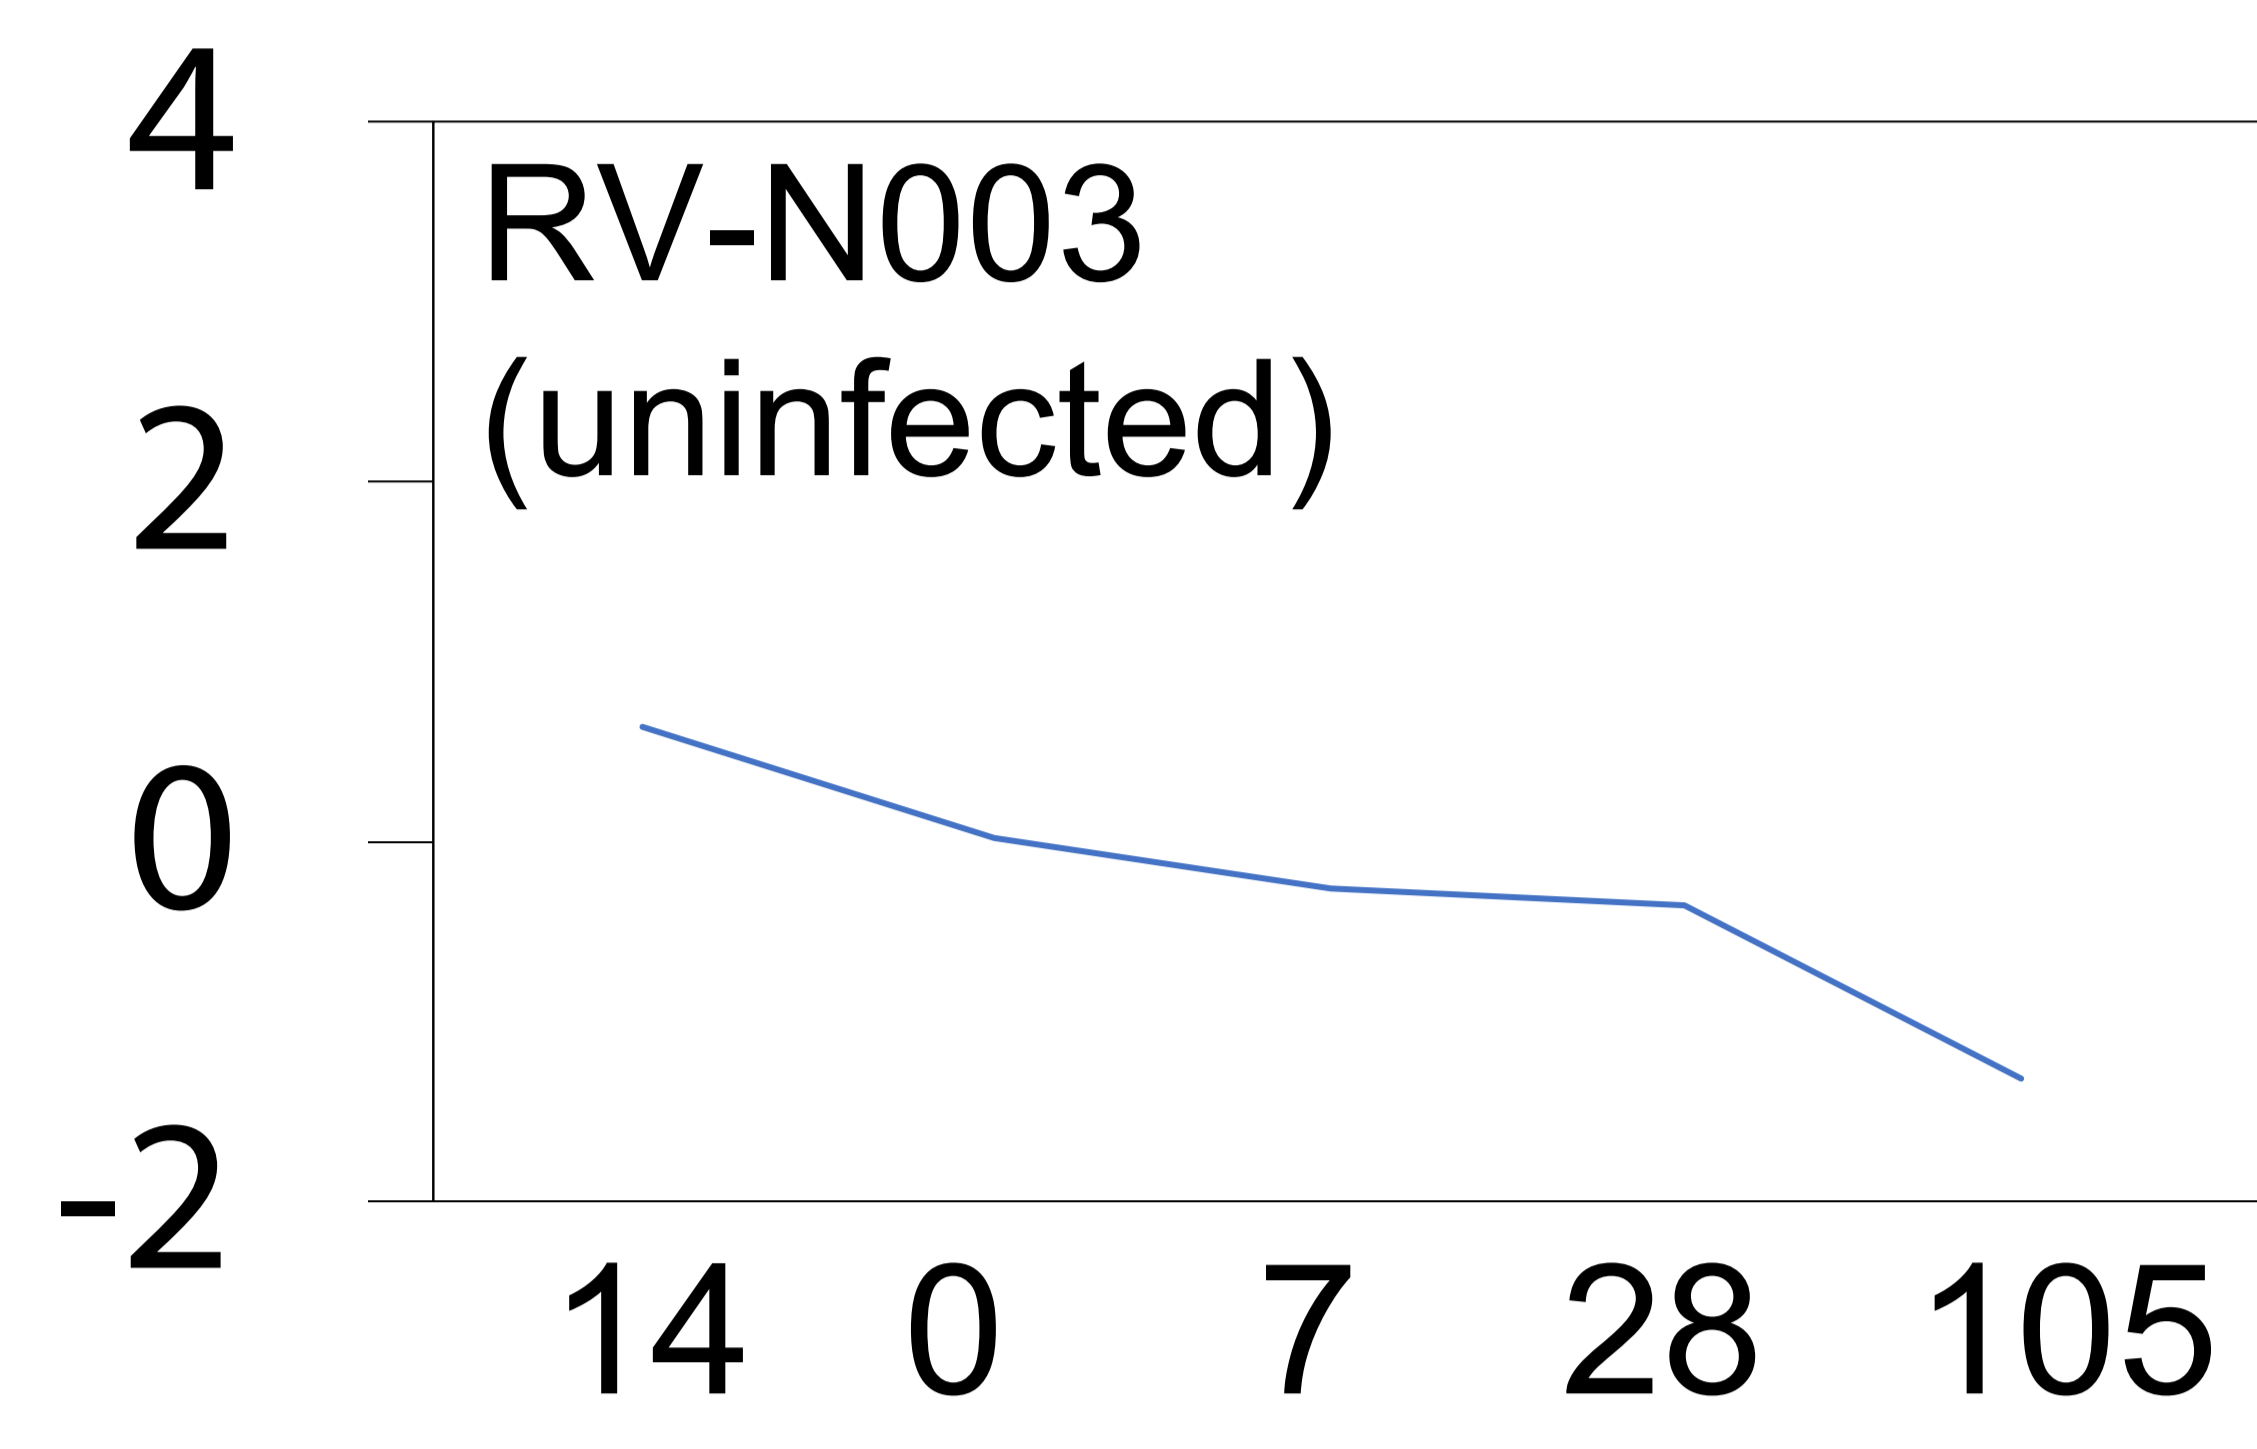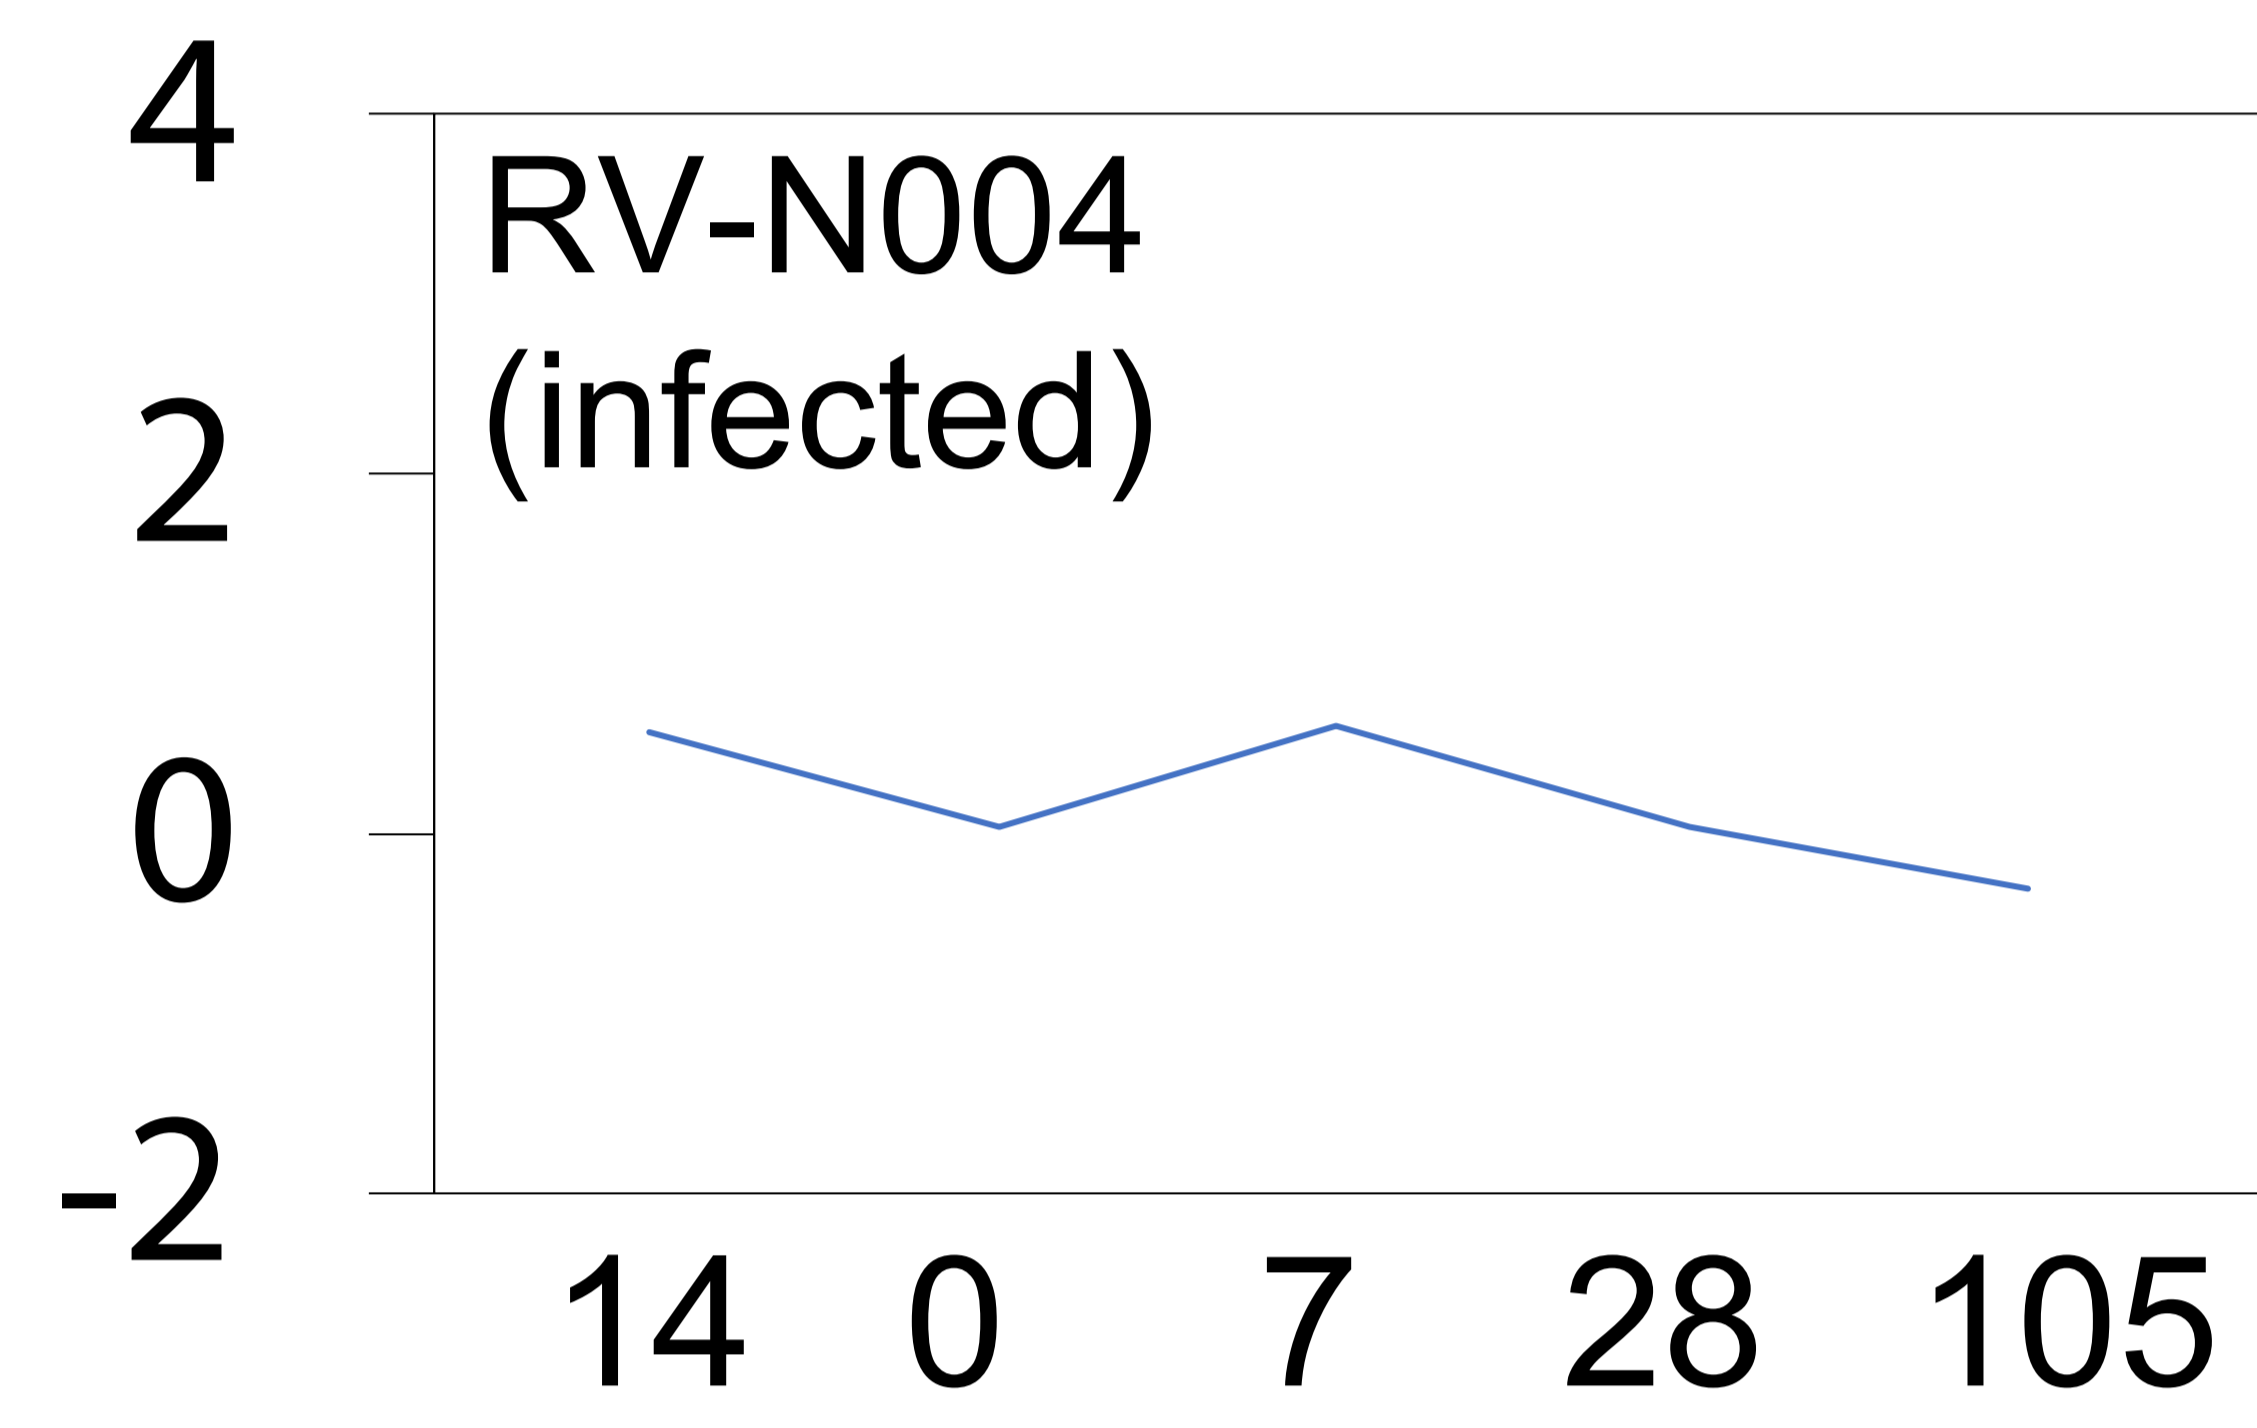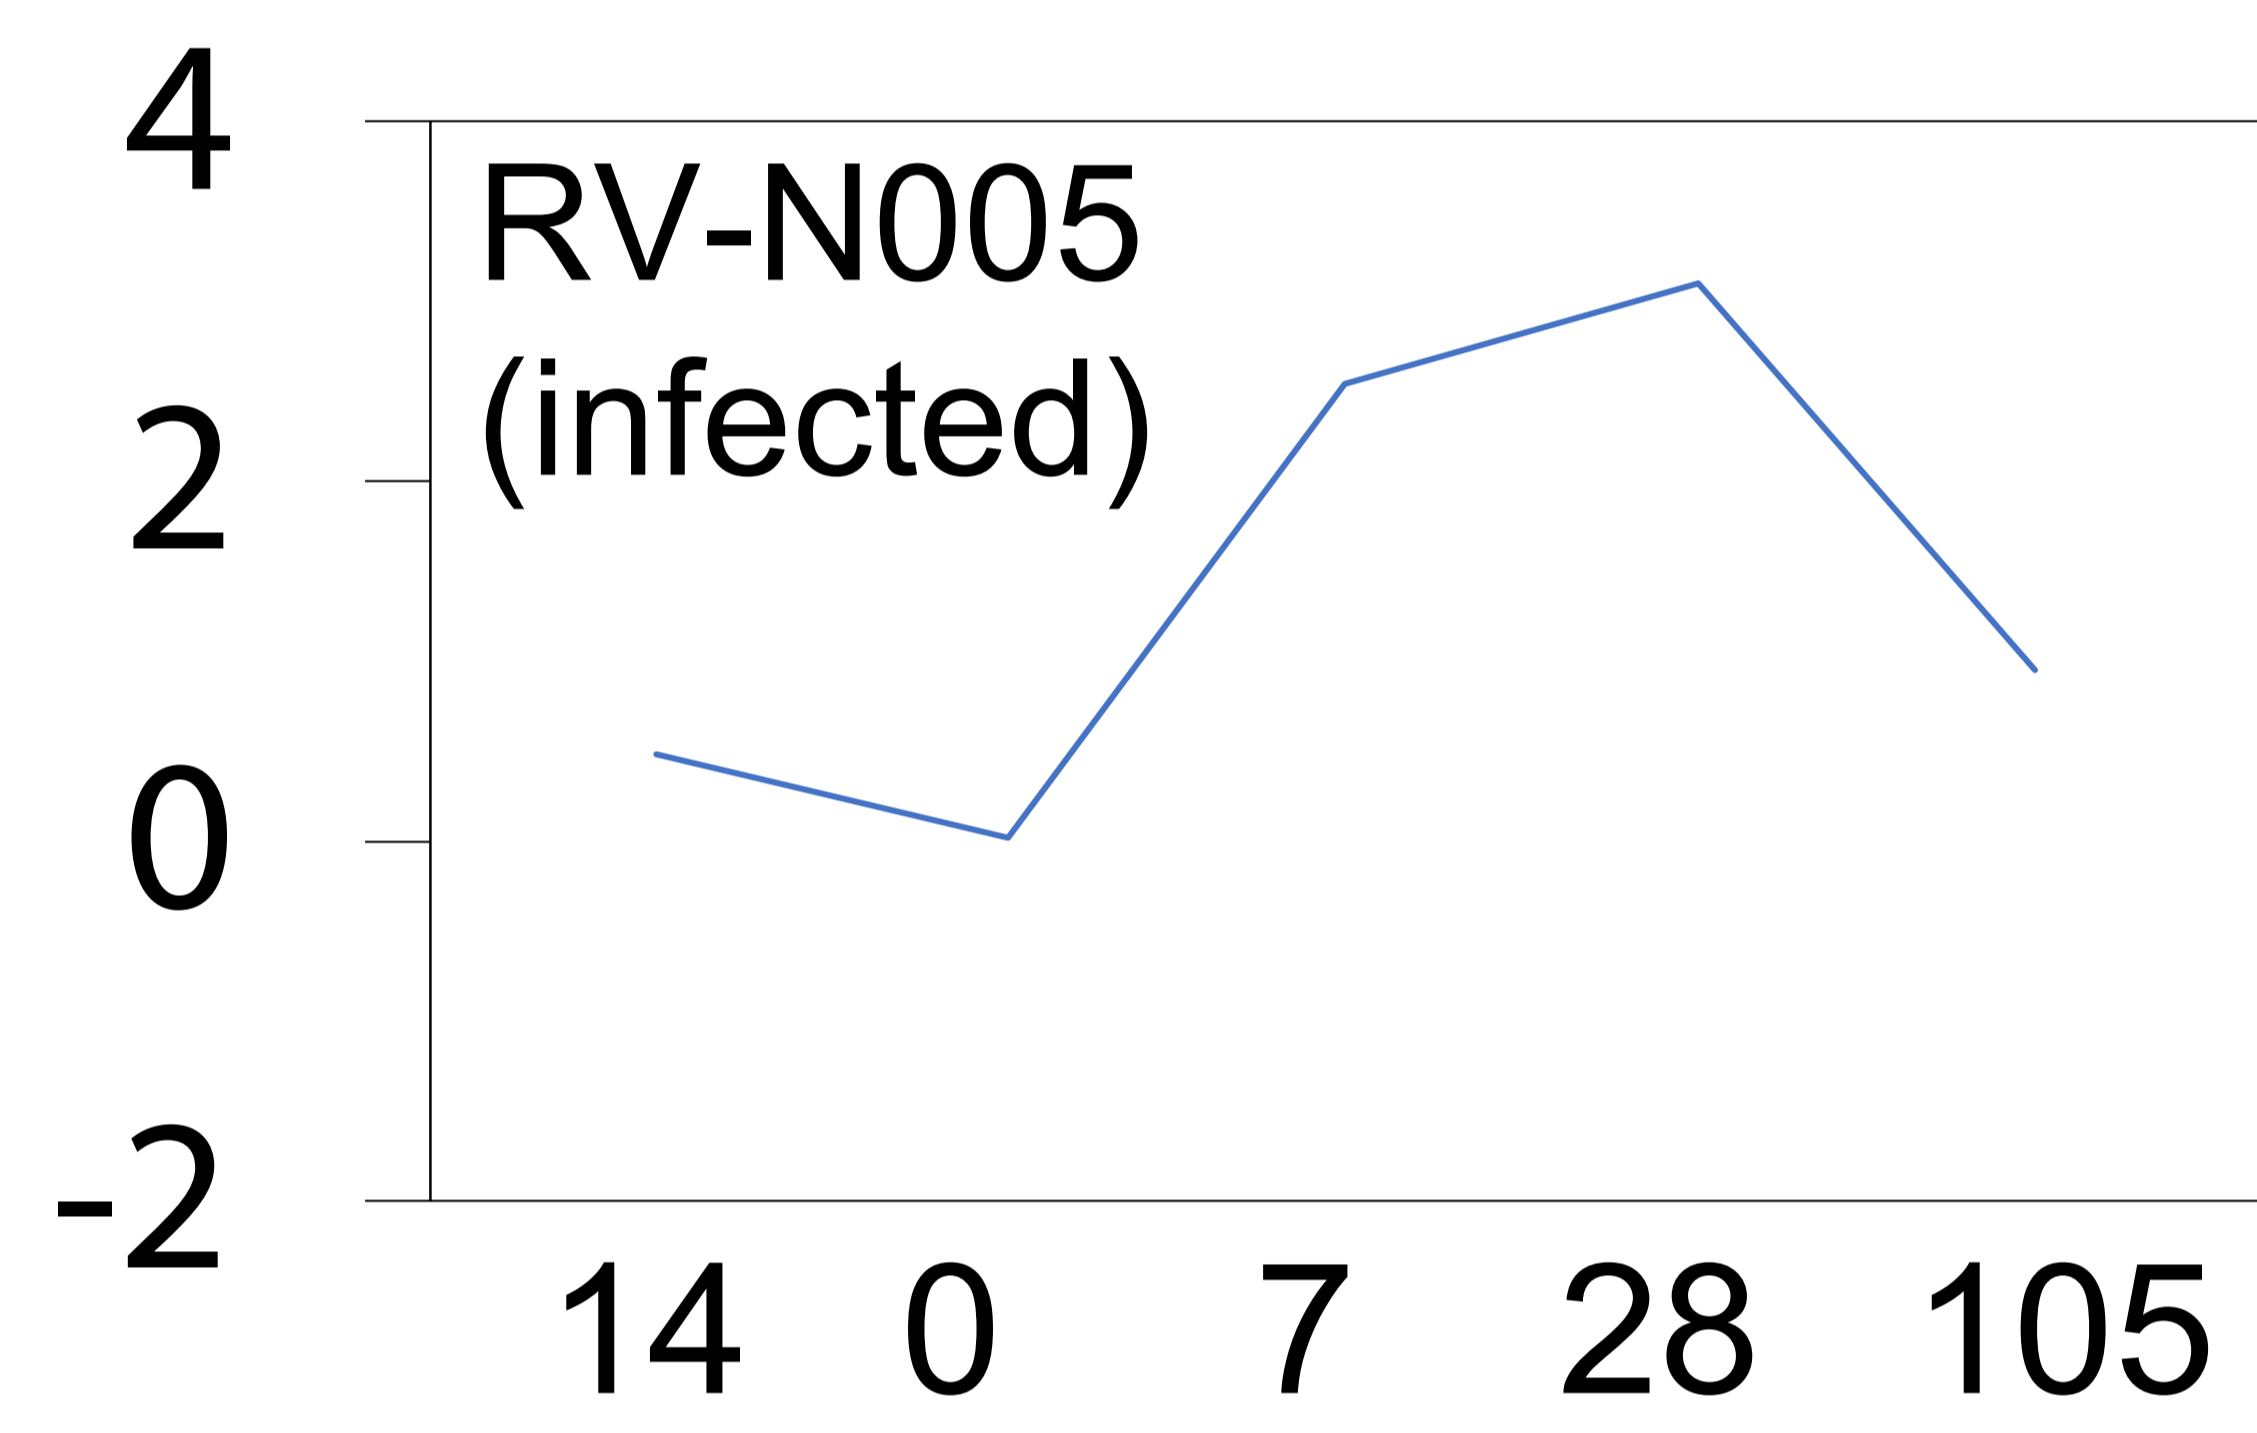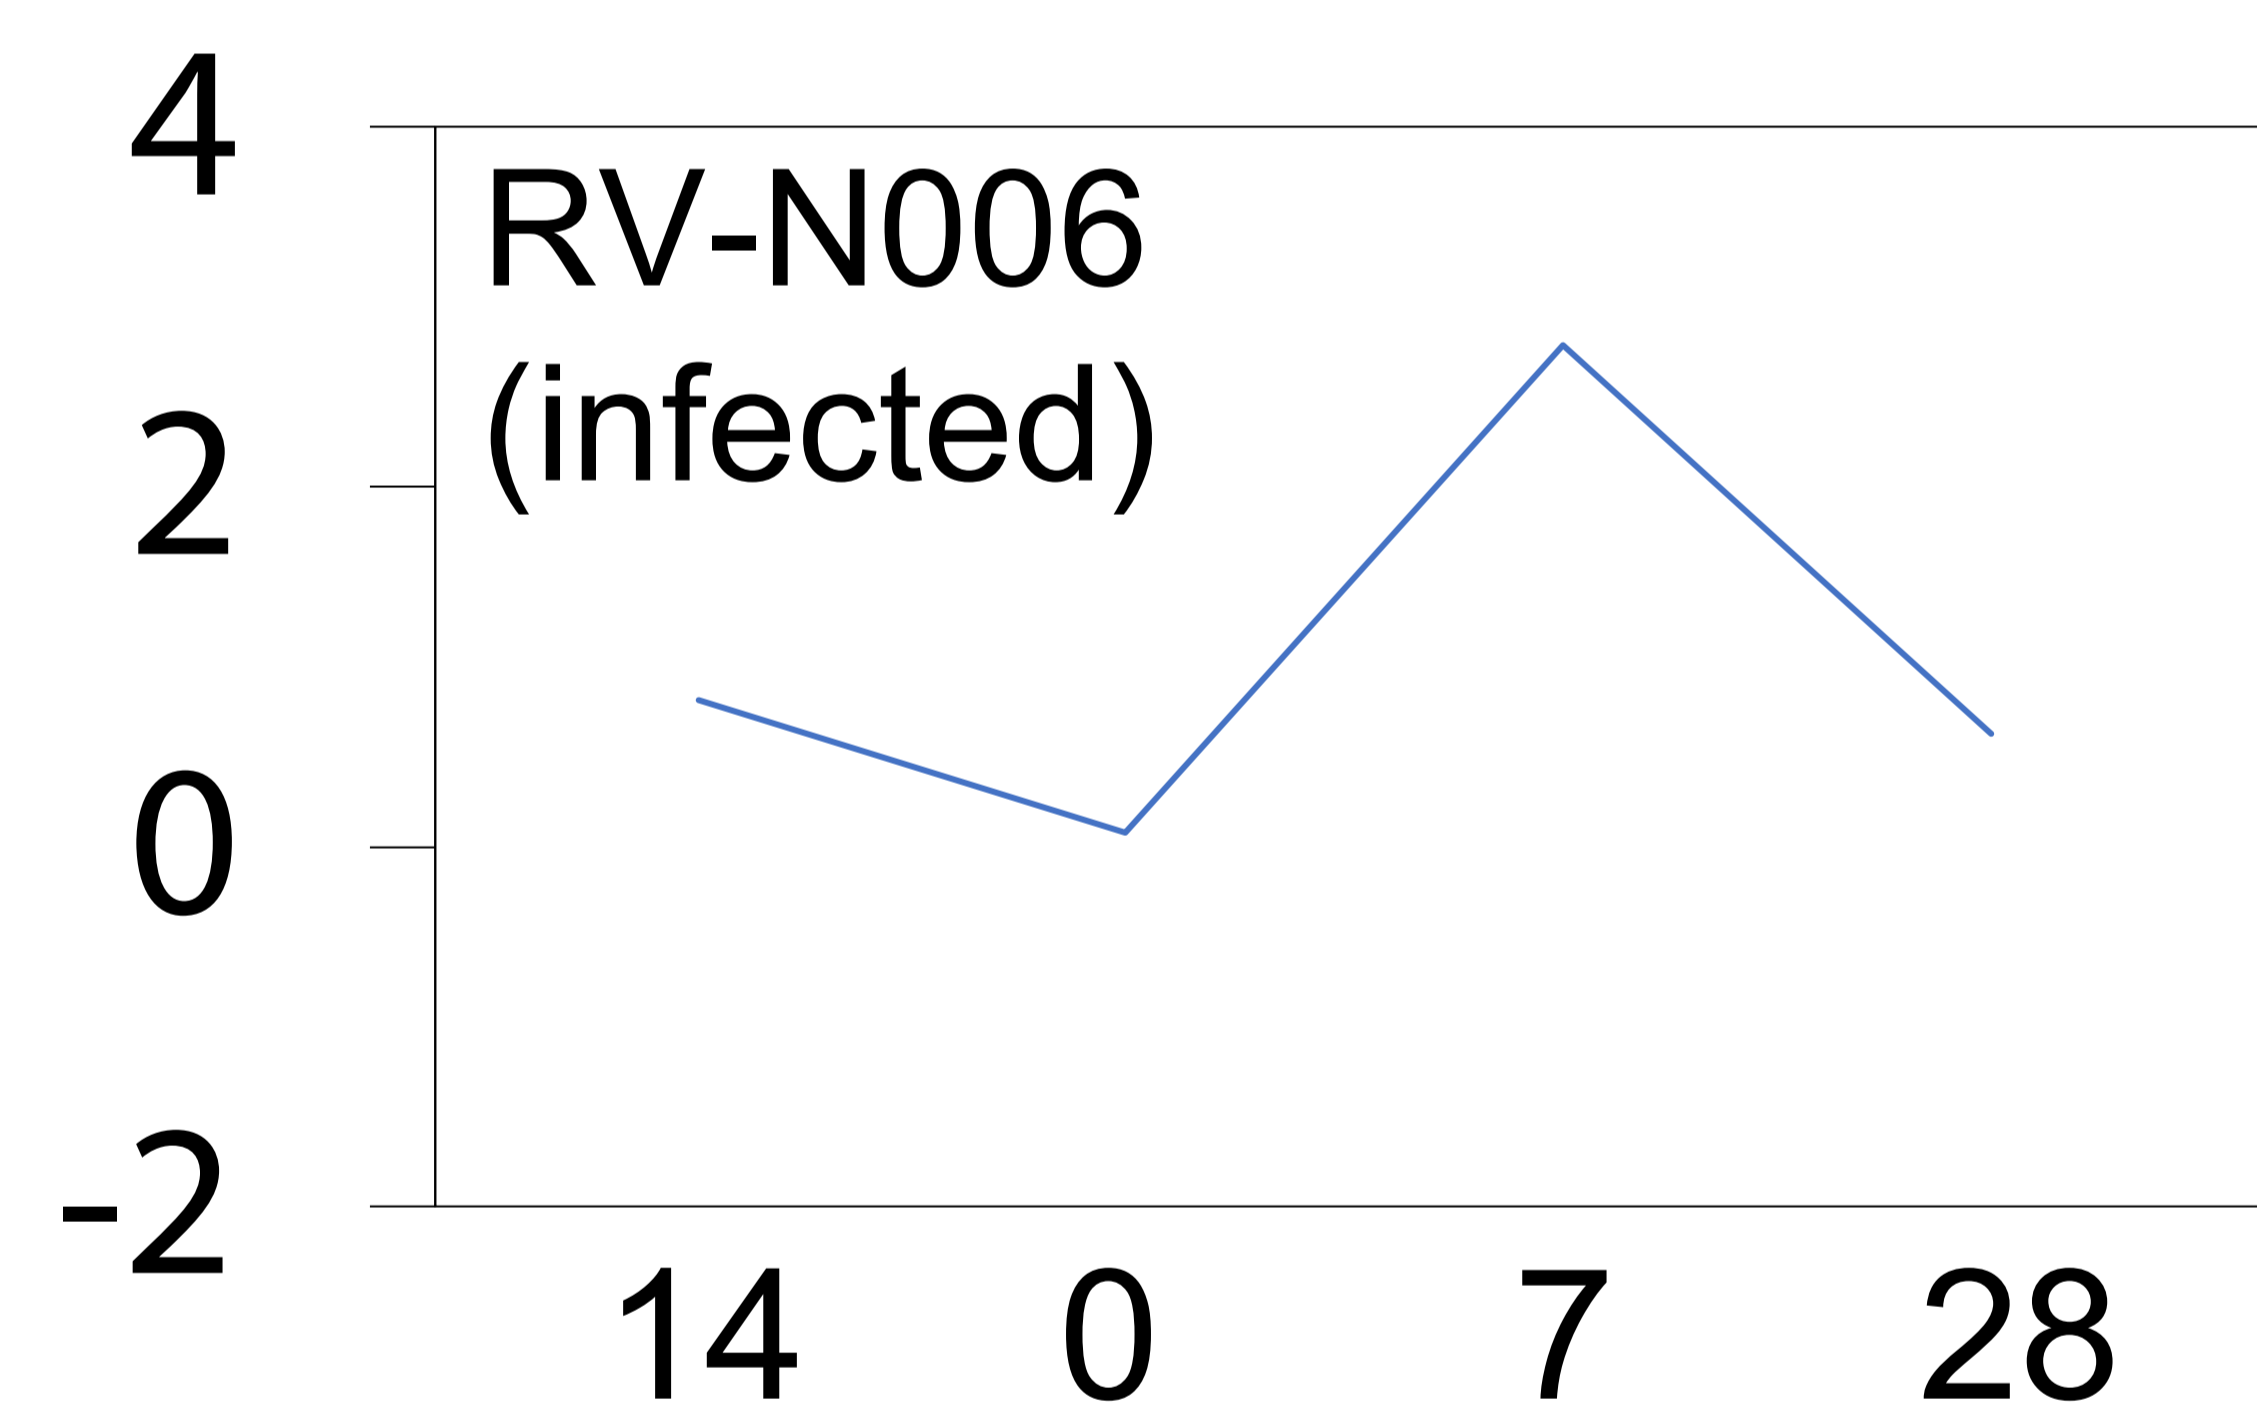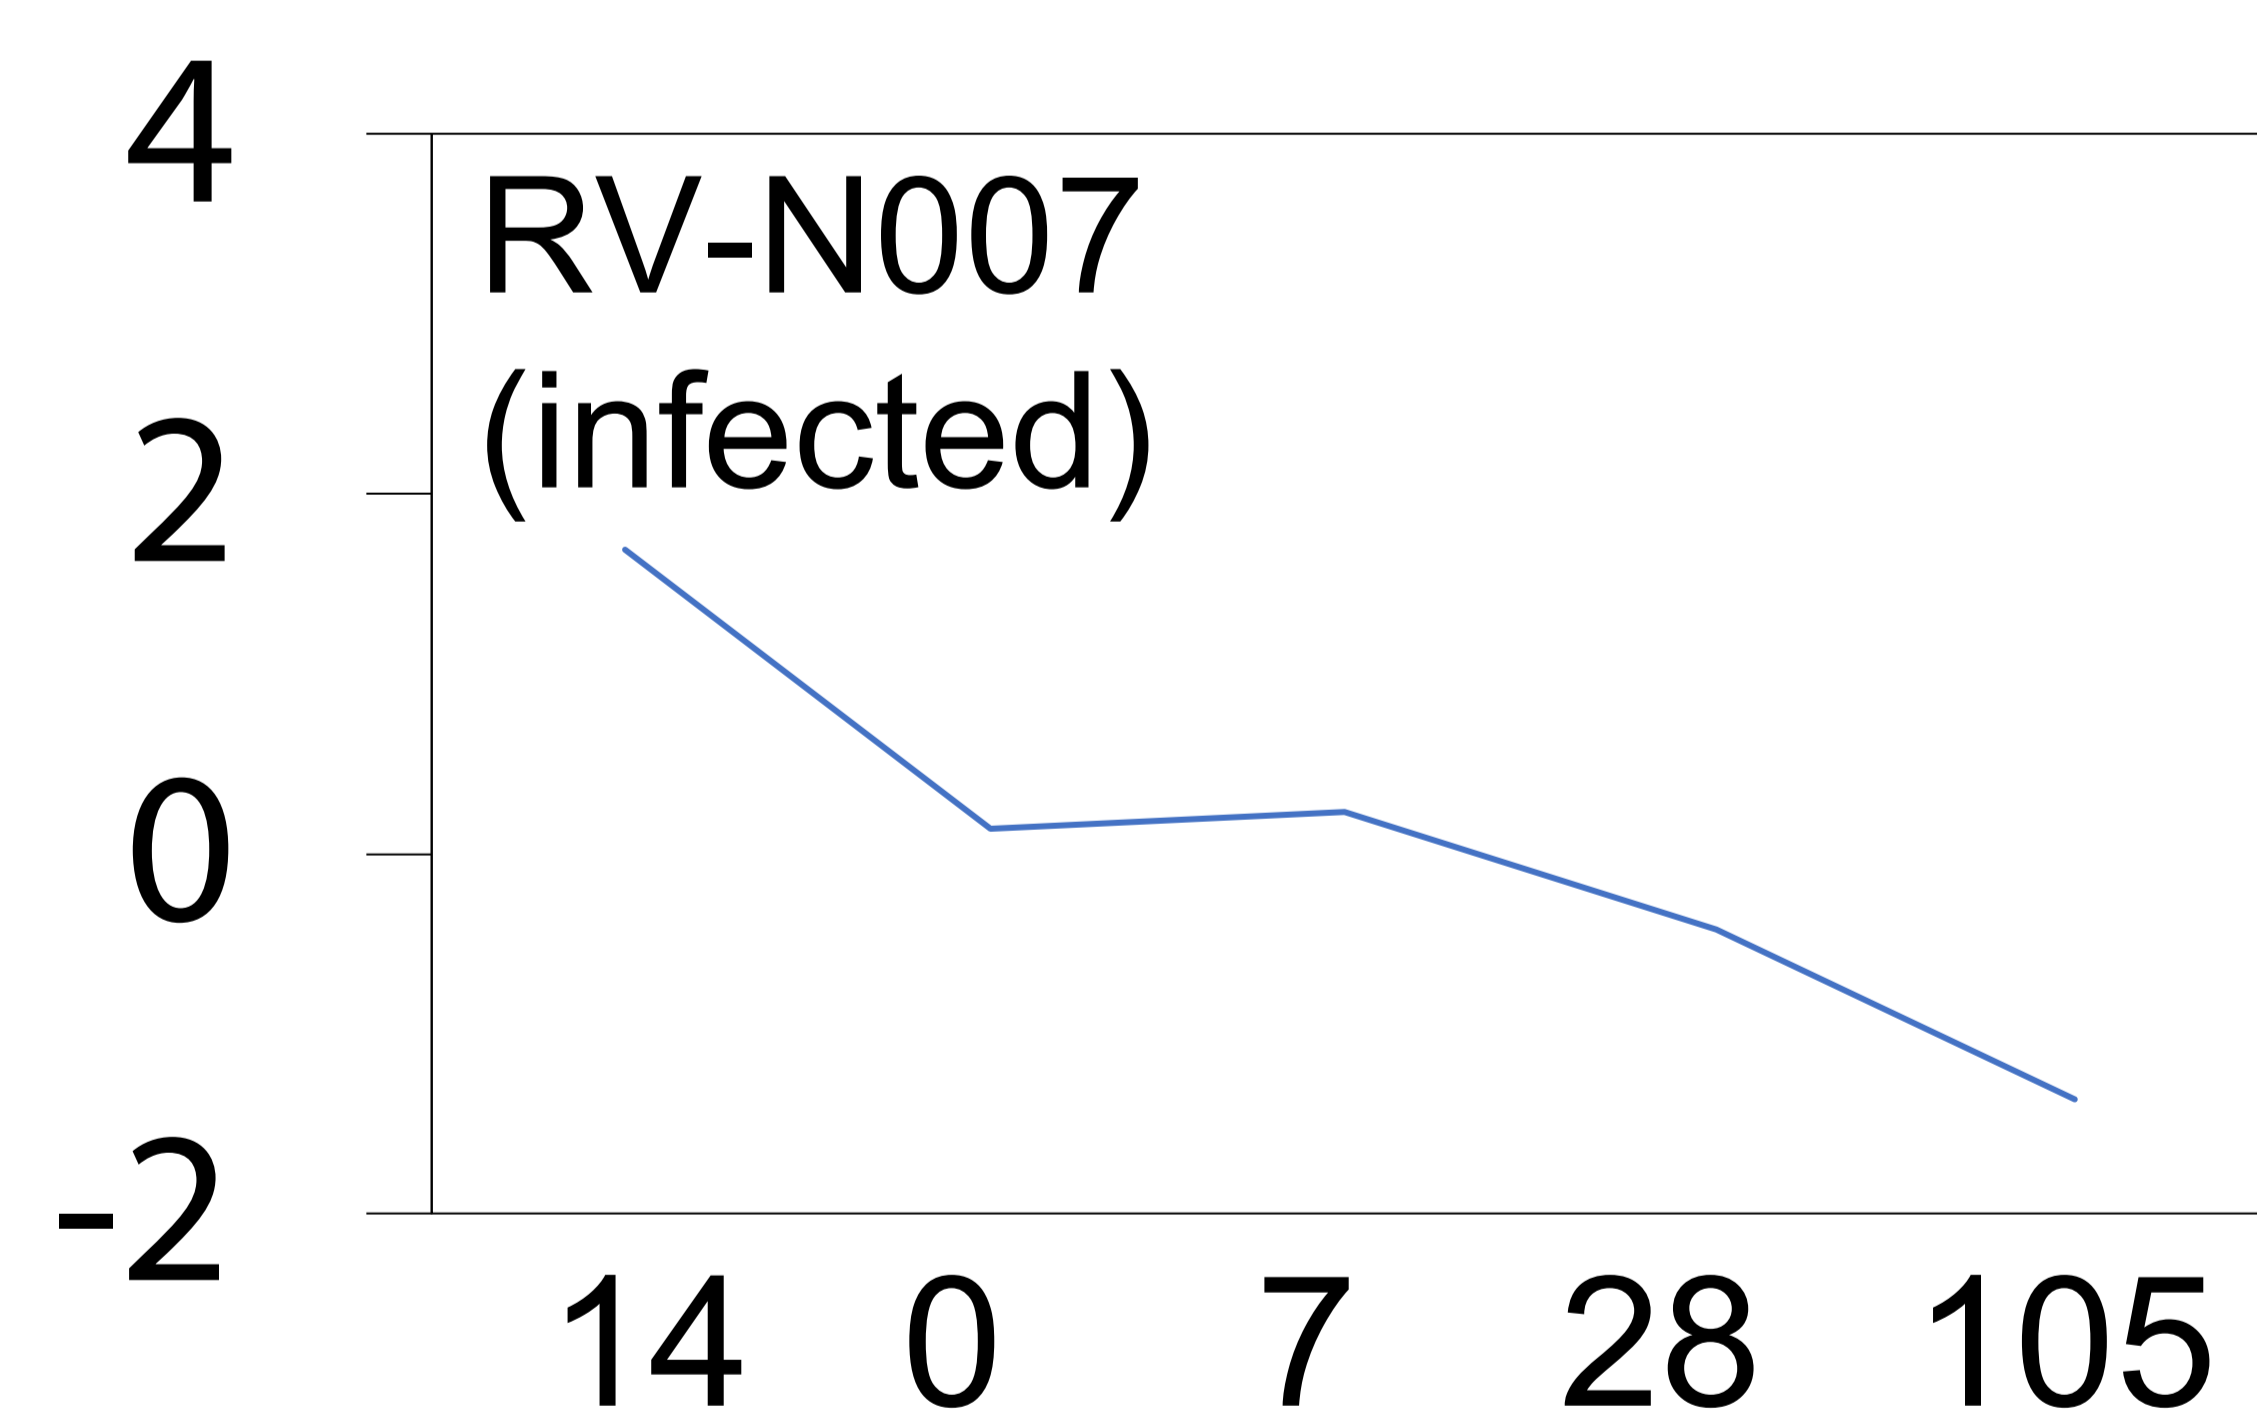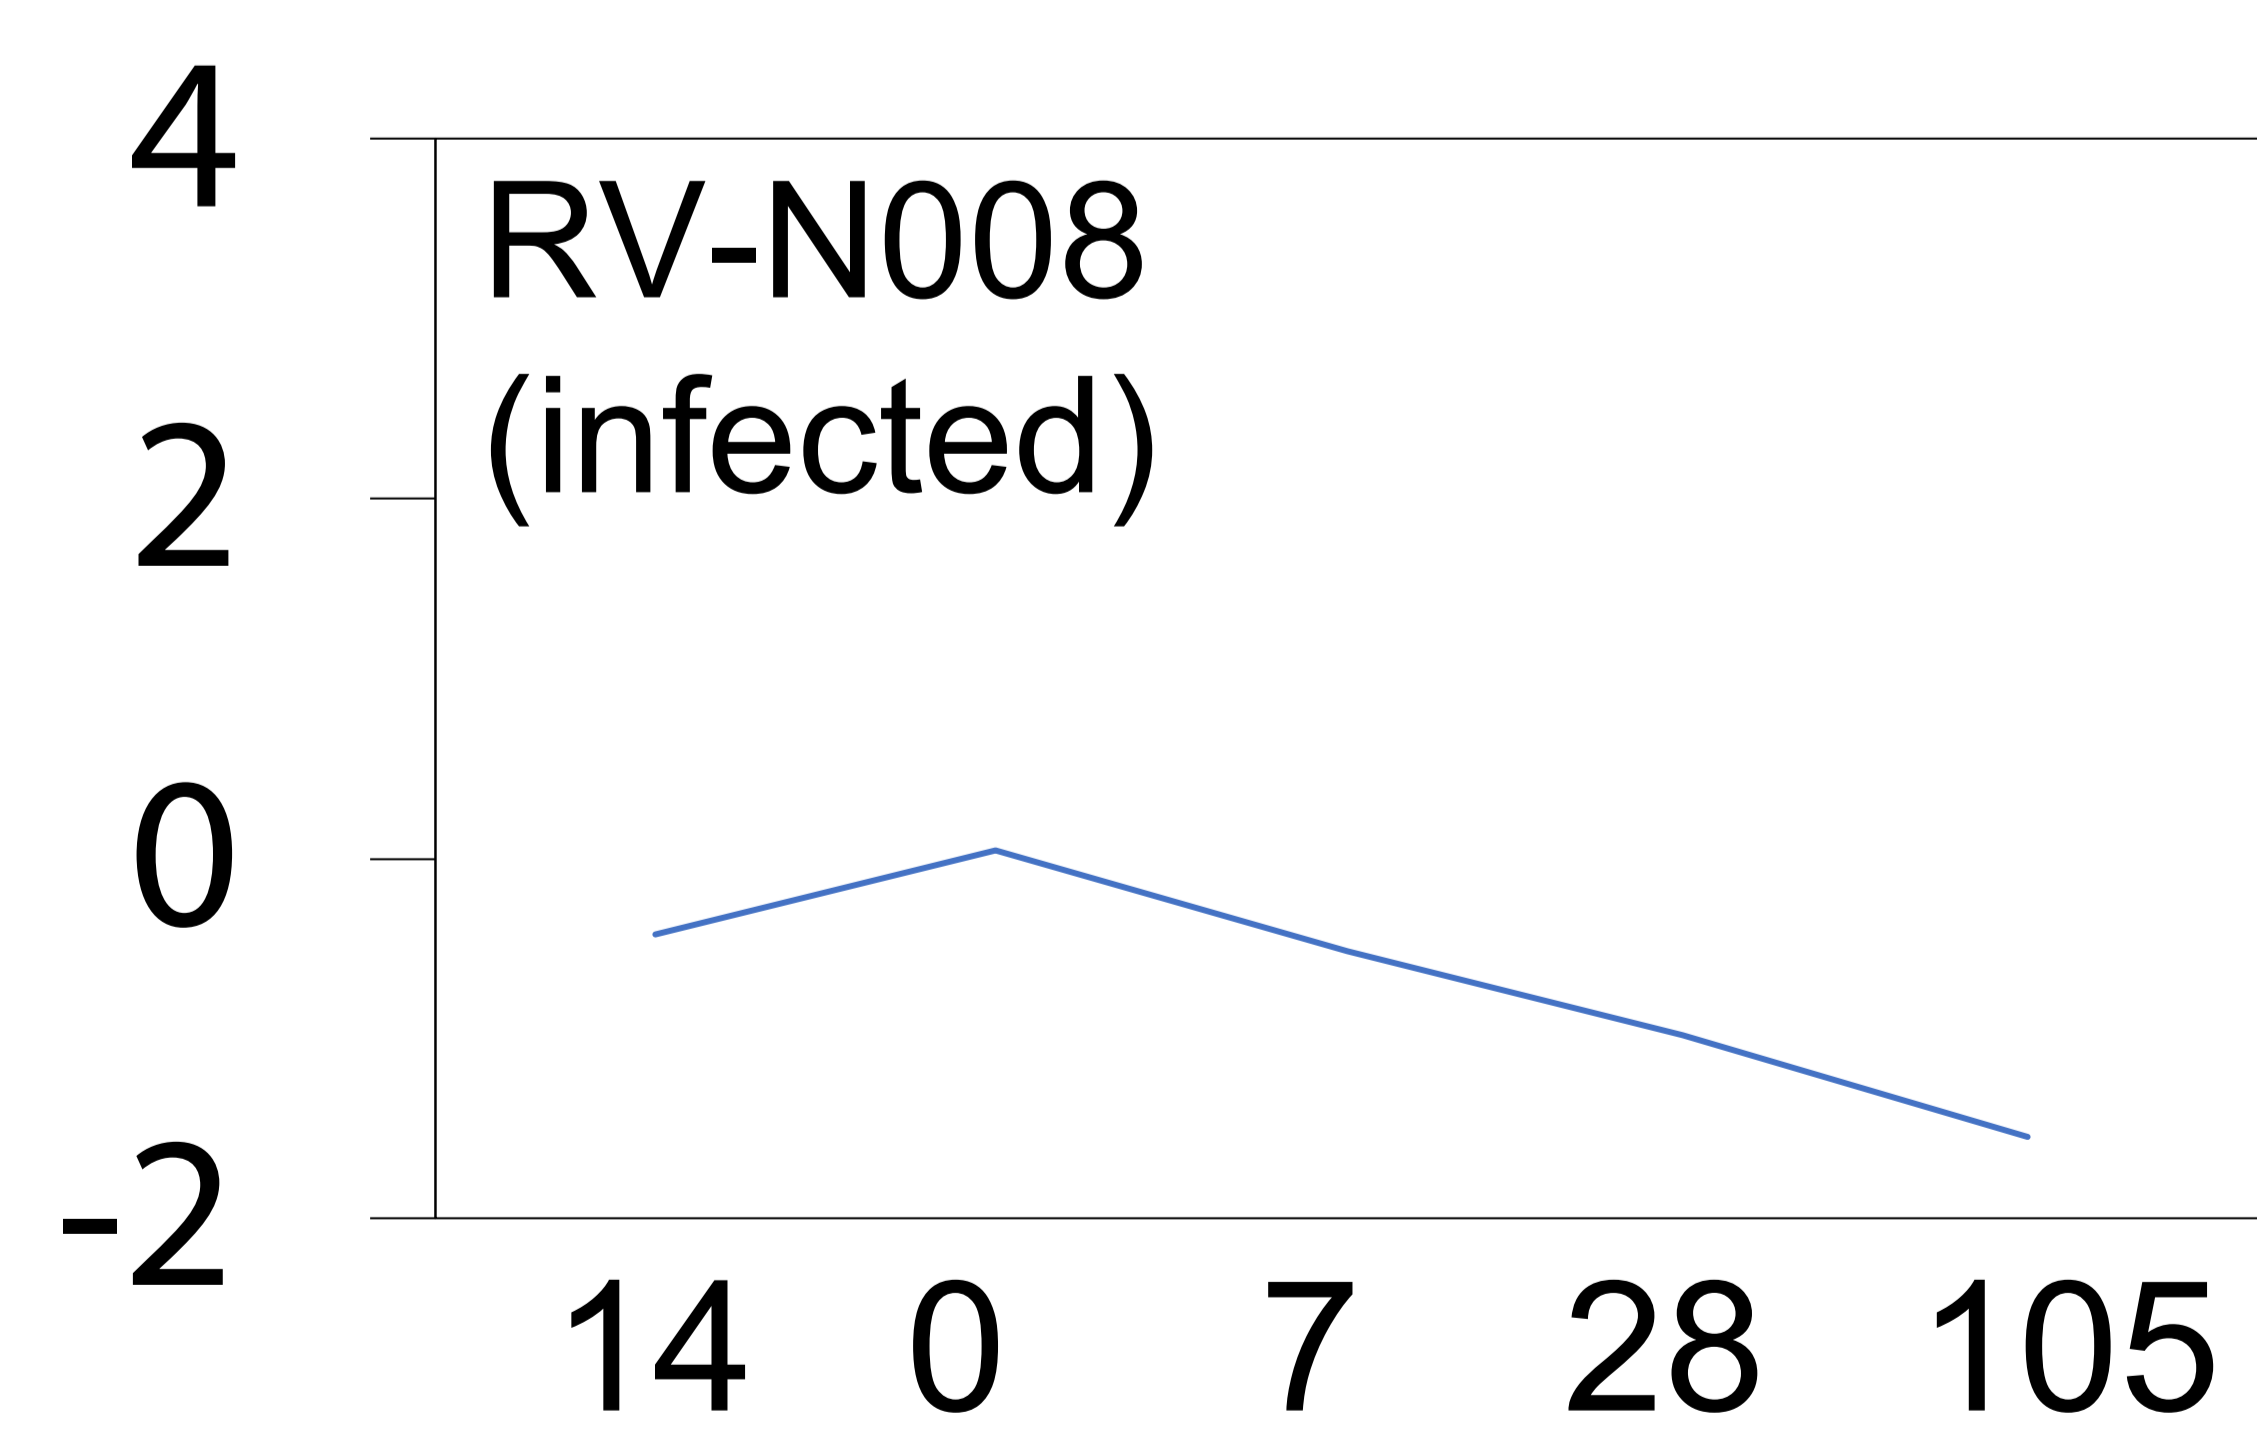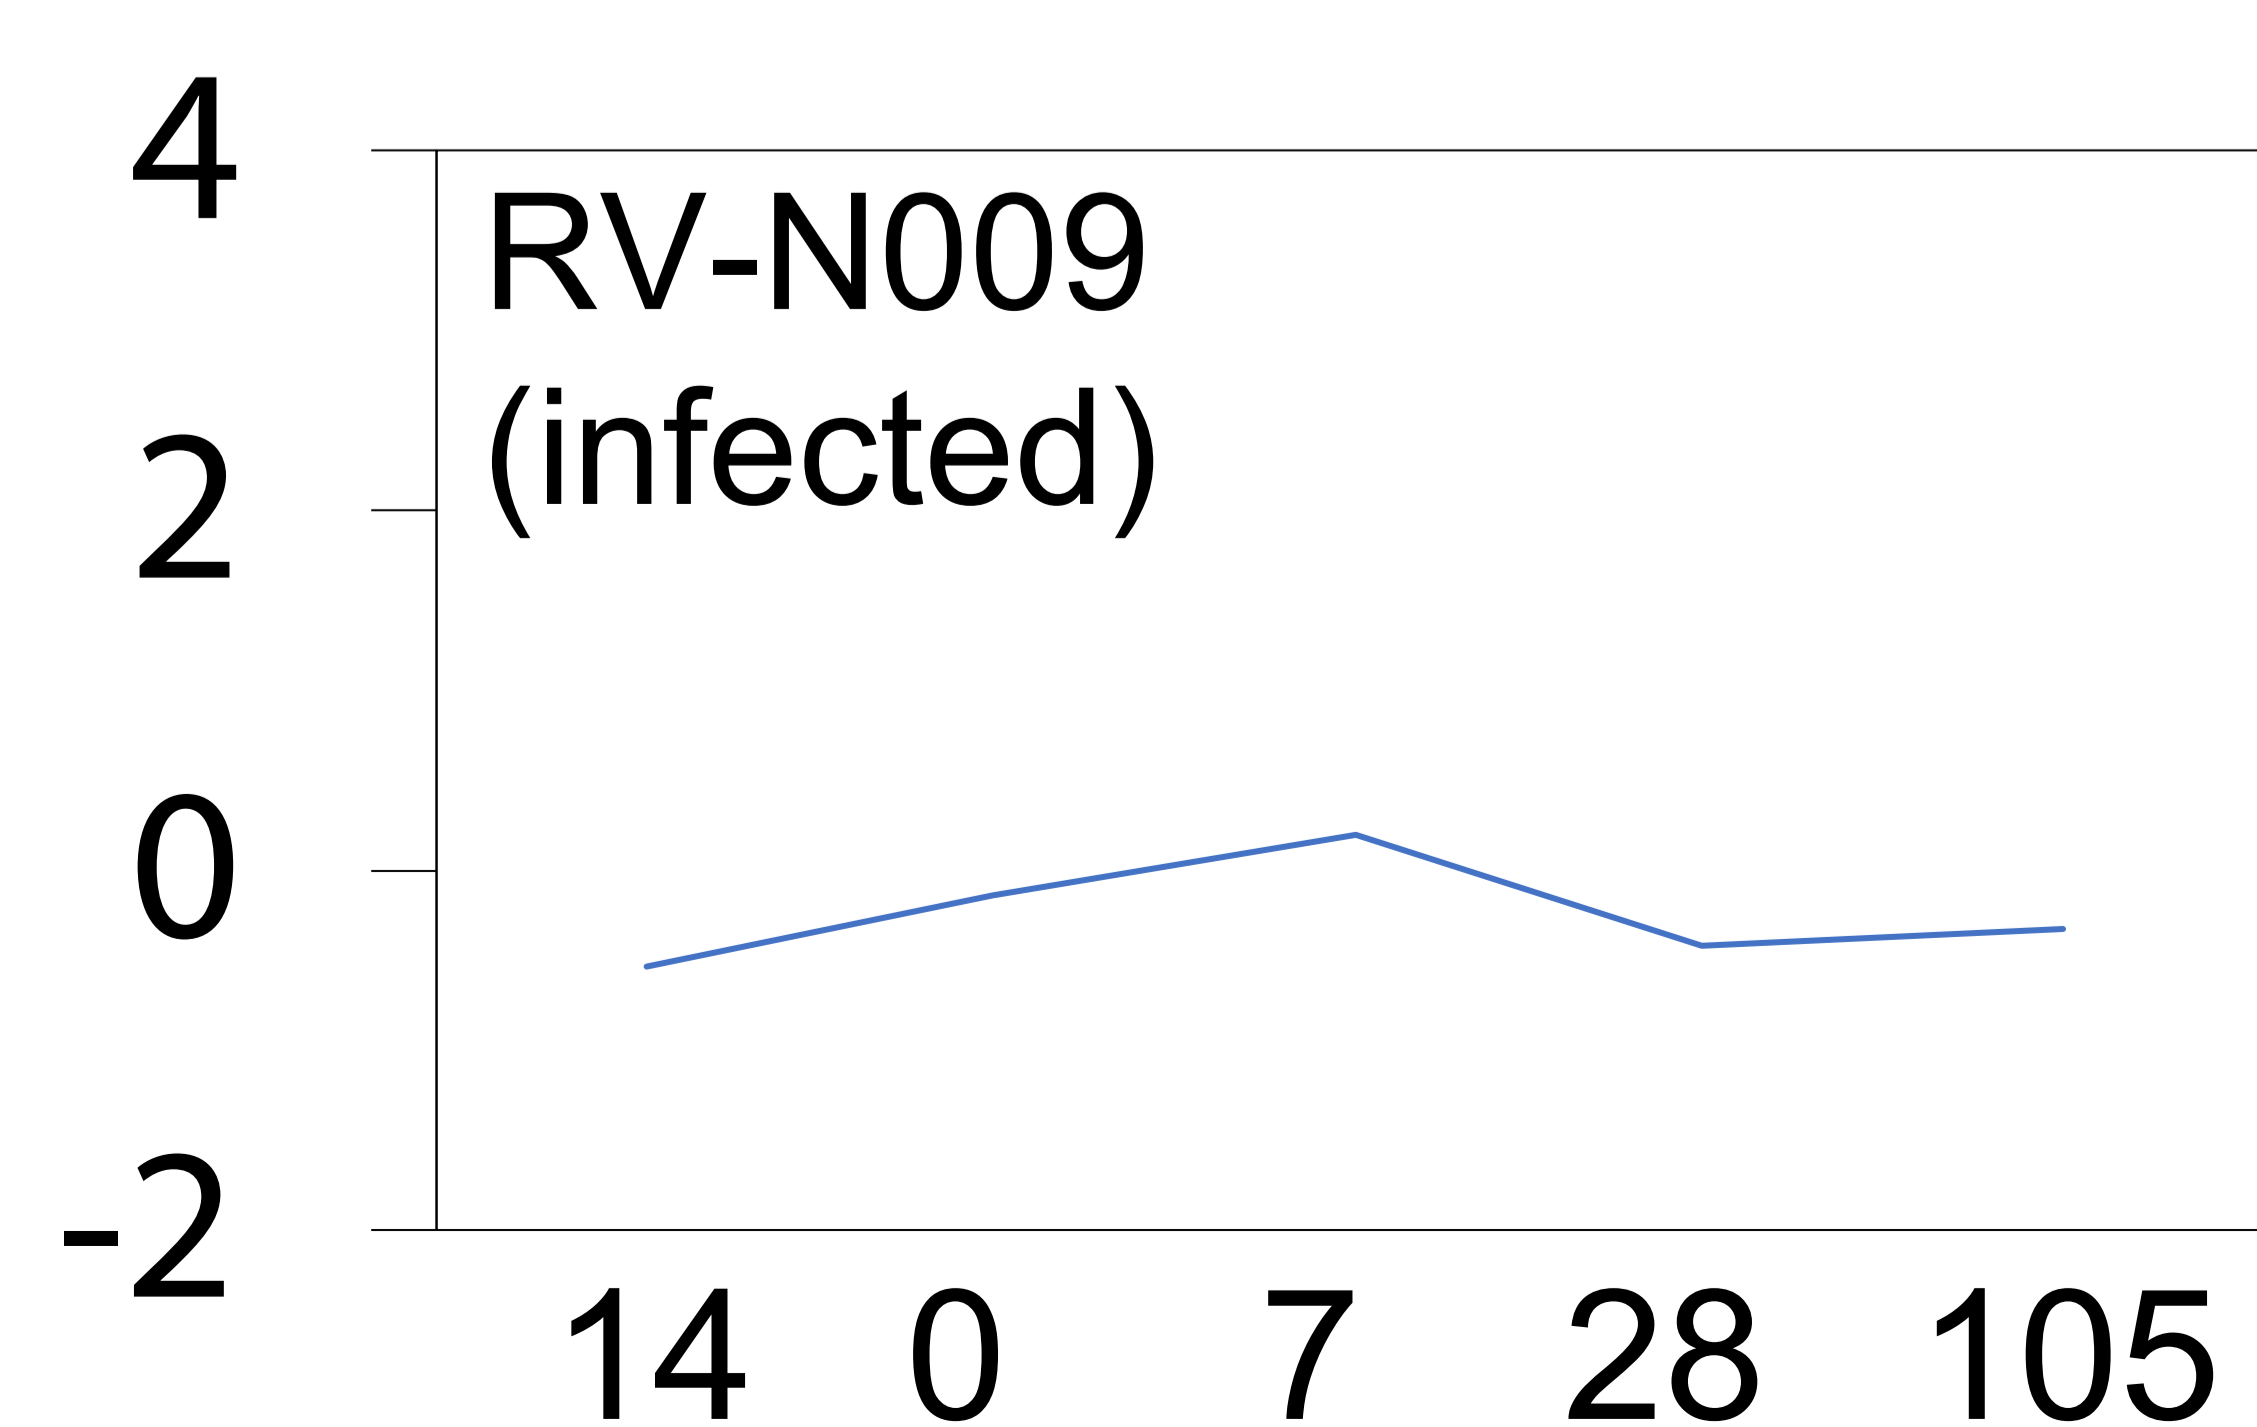

B

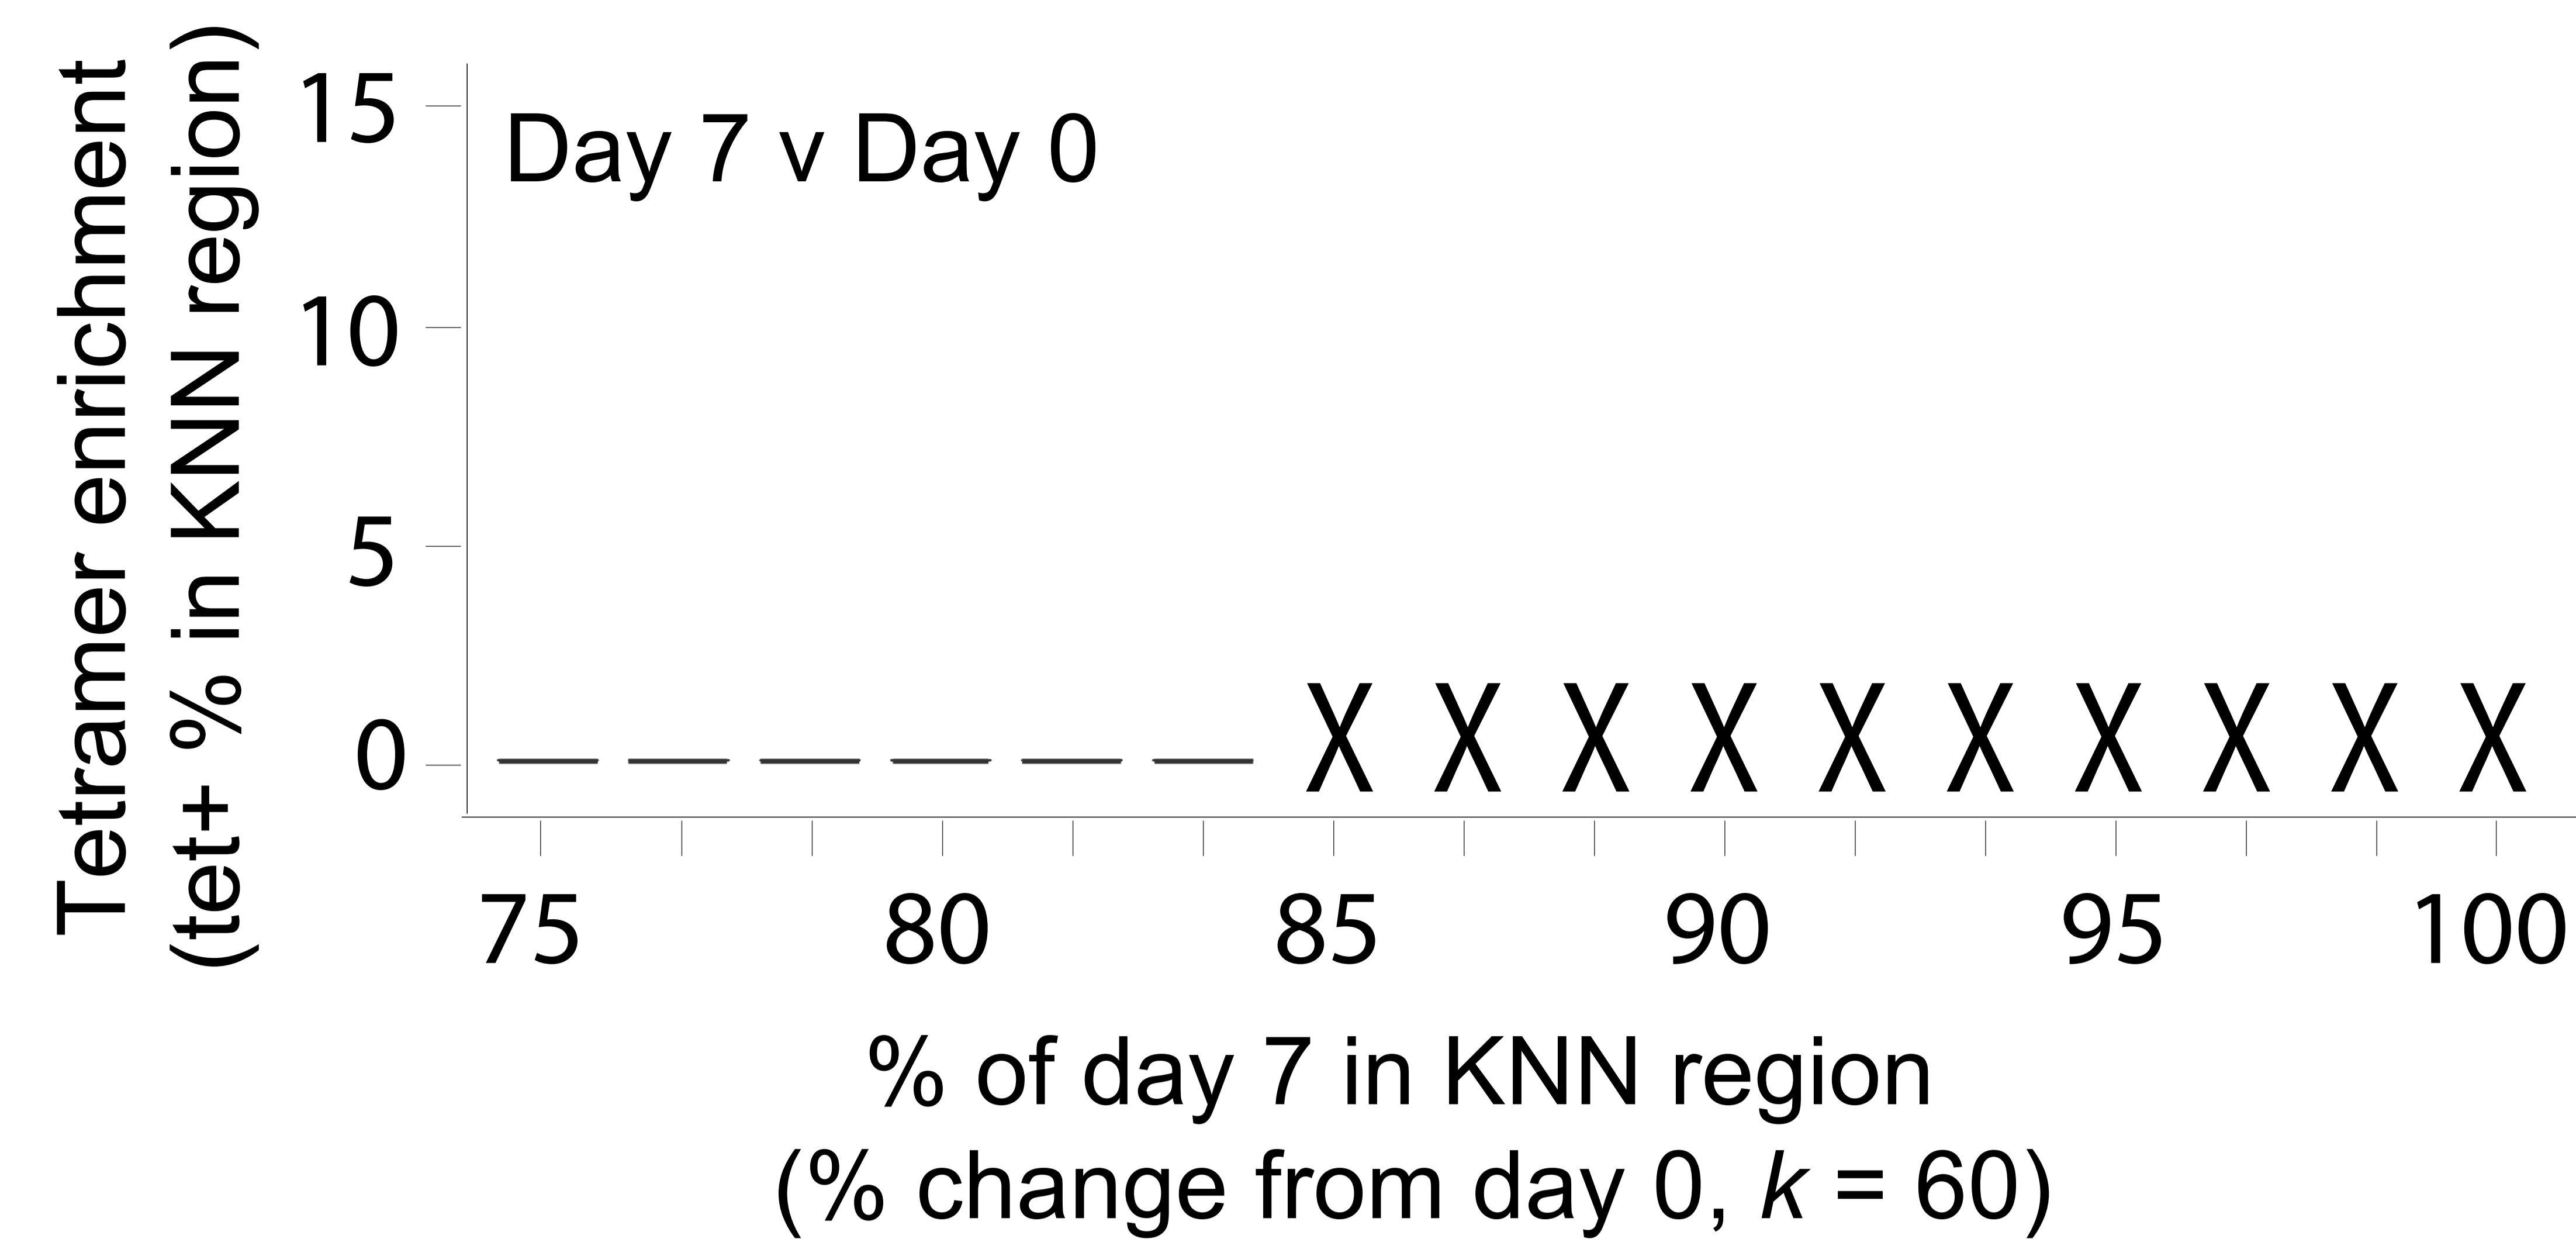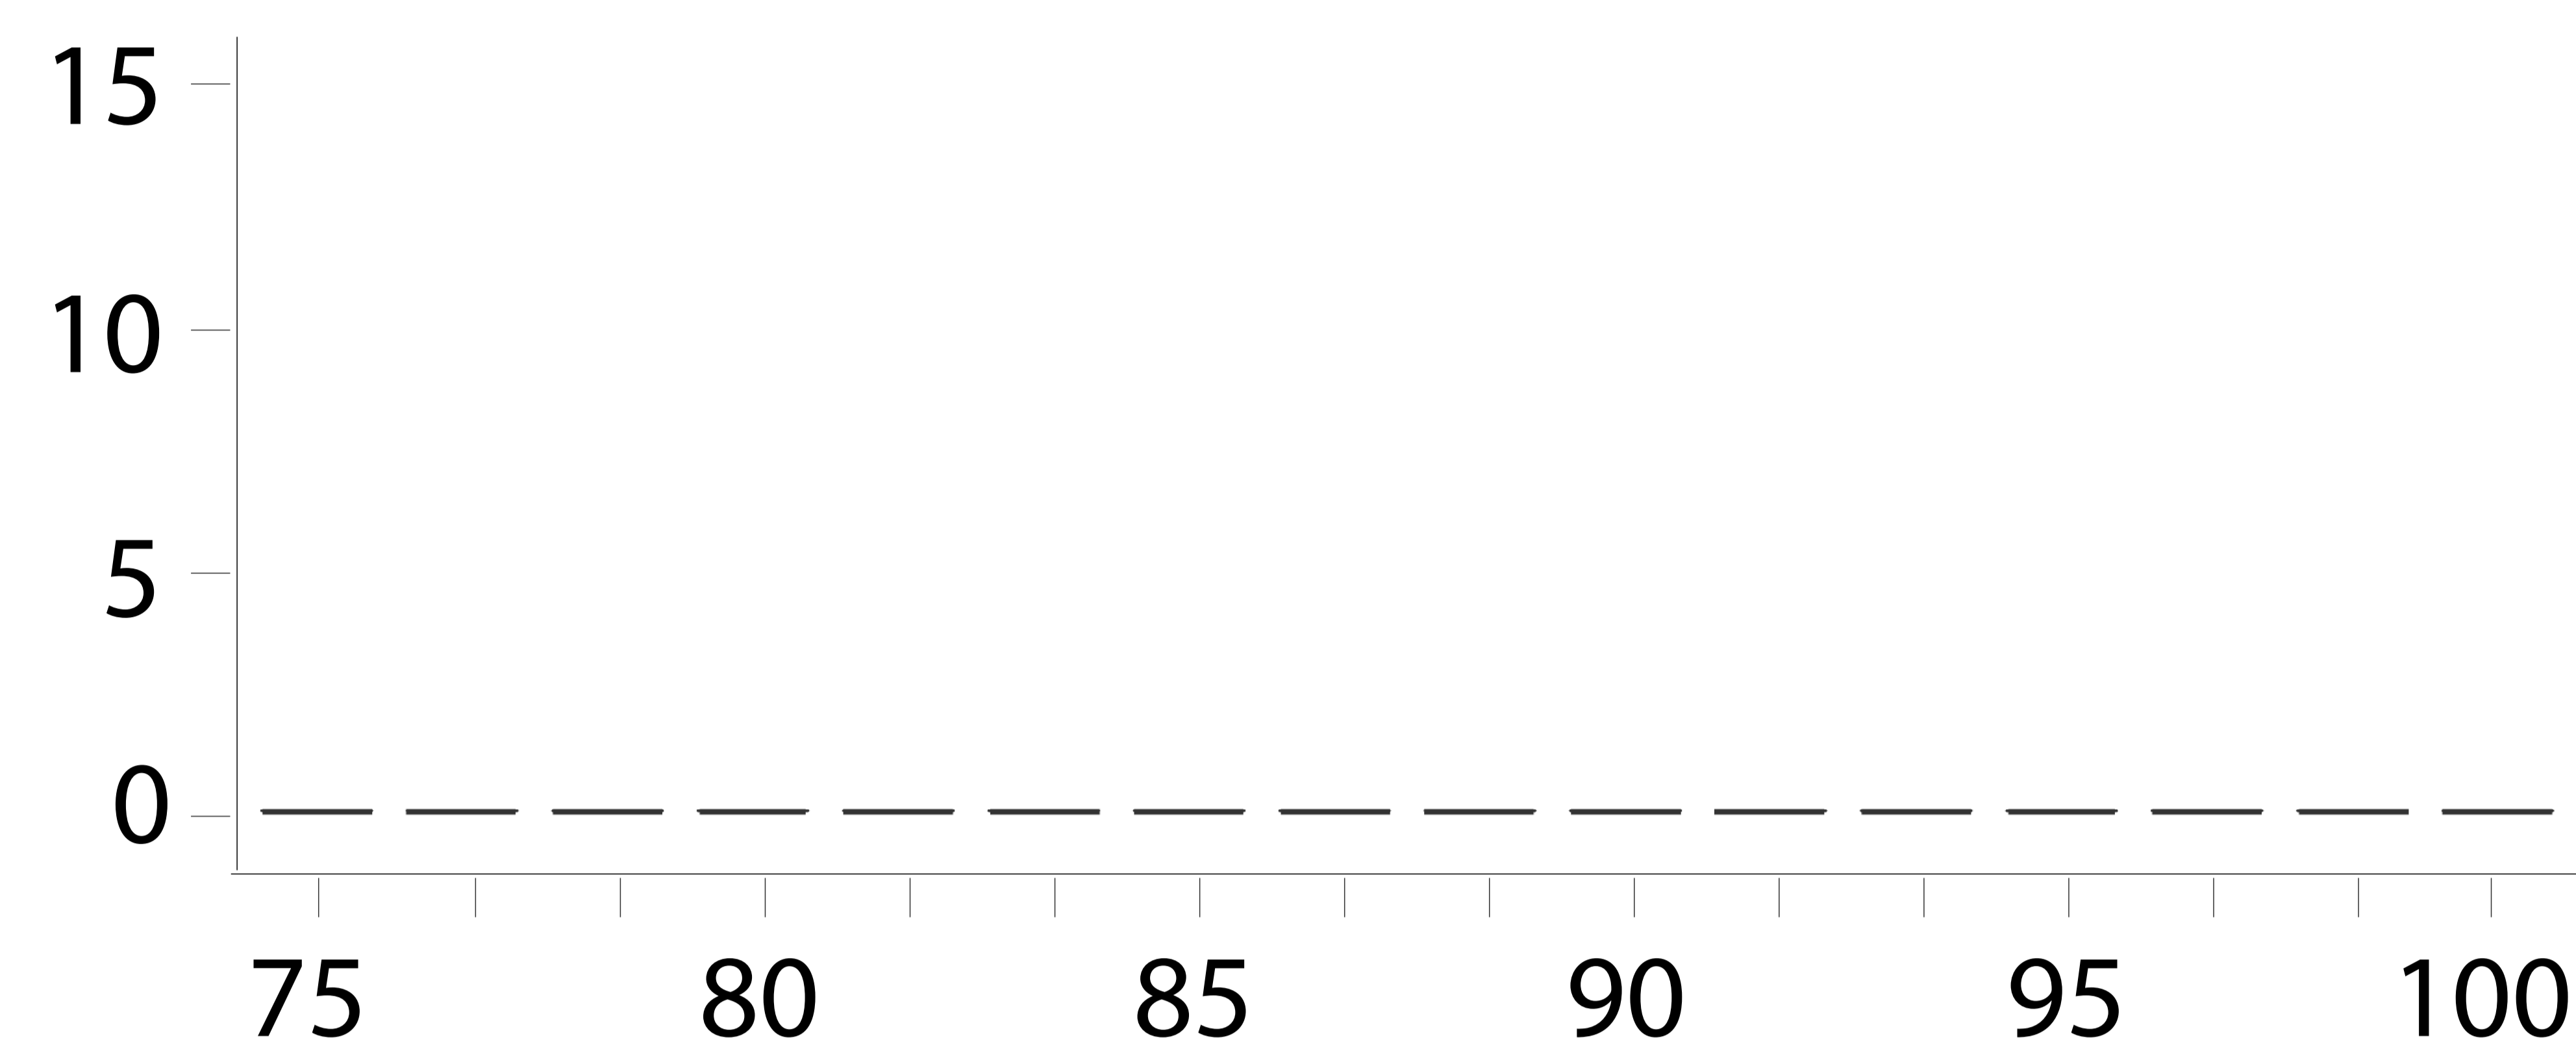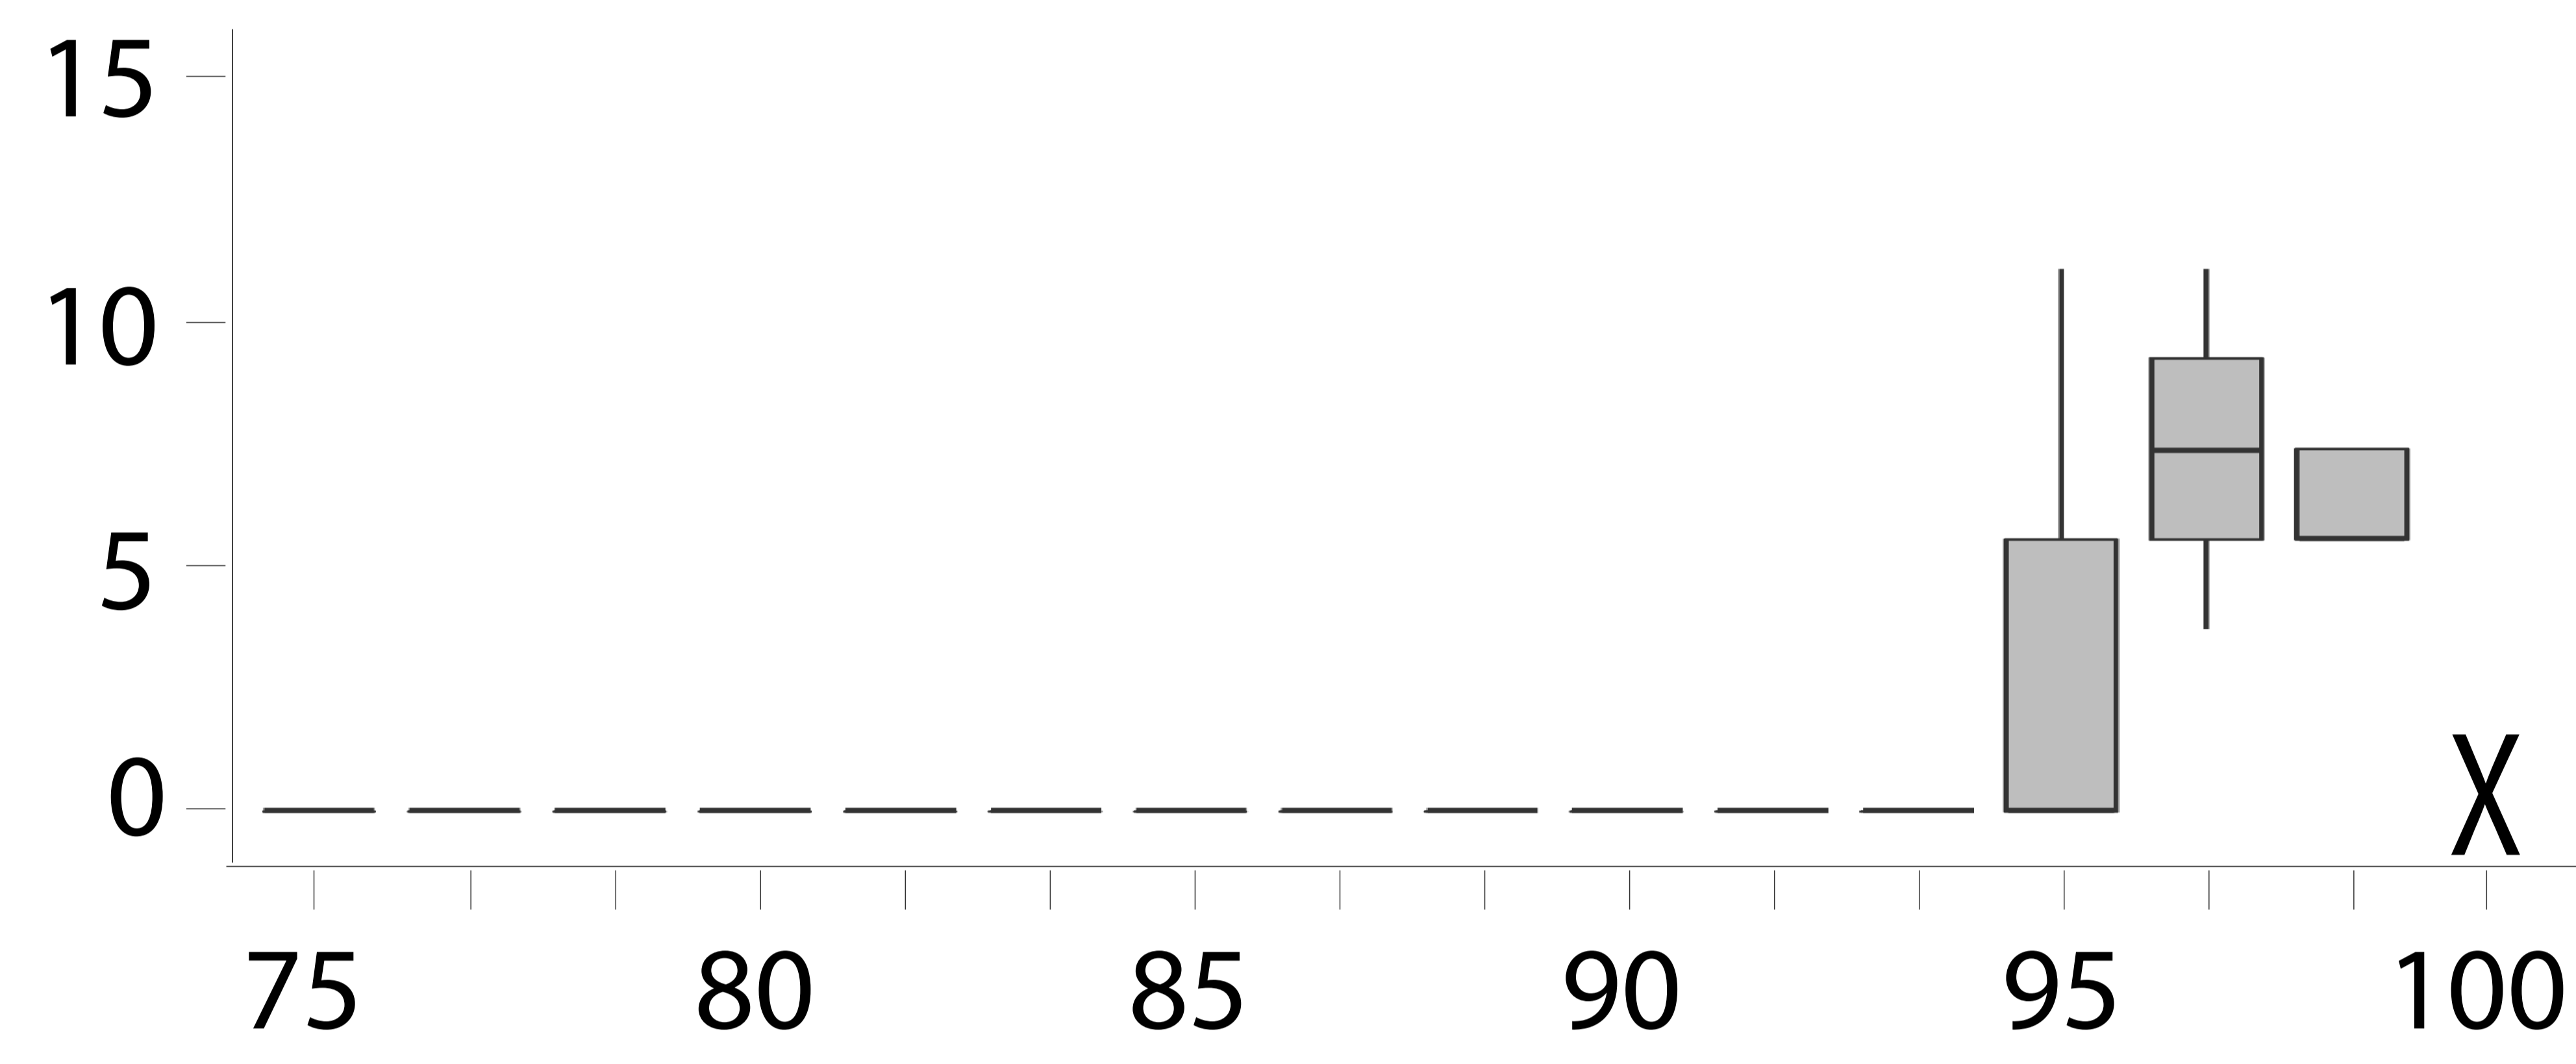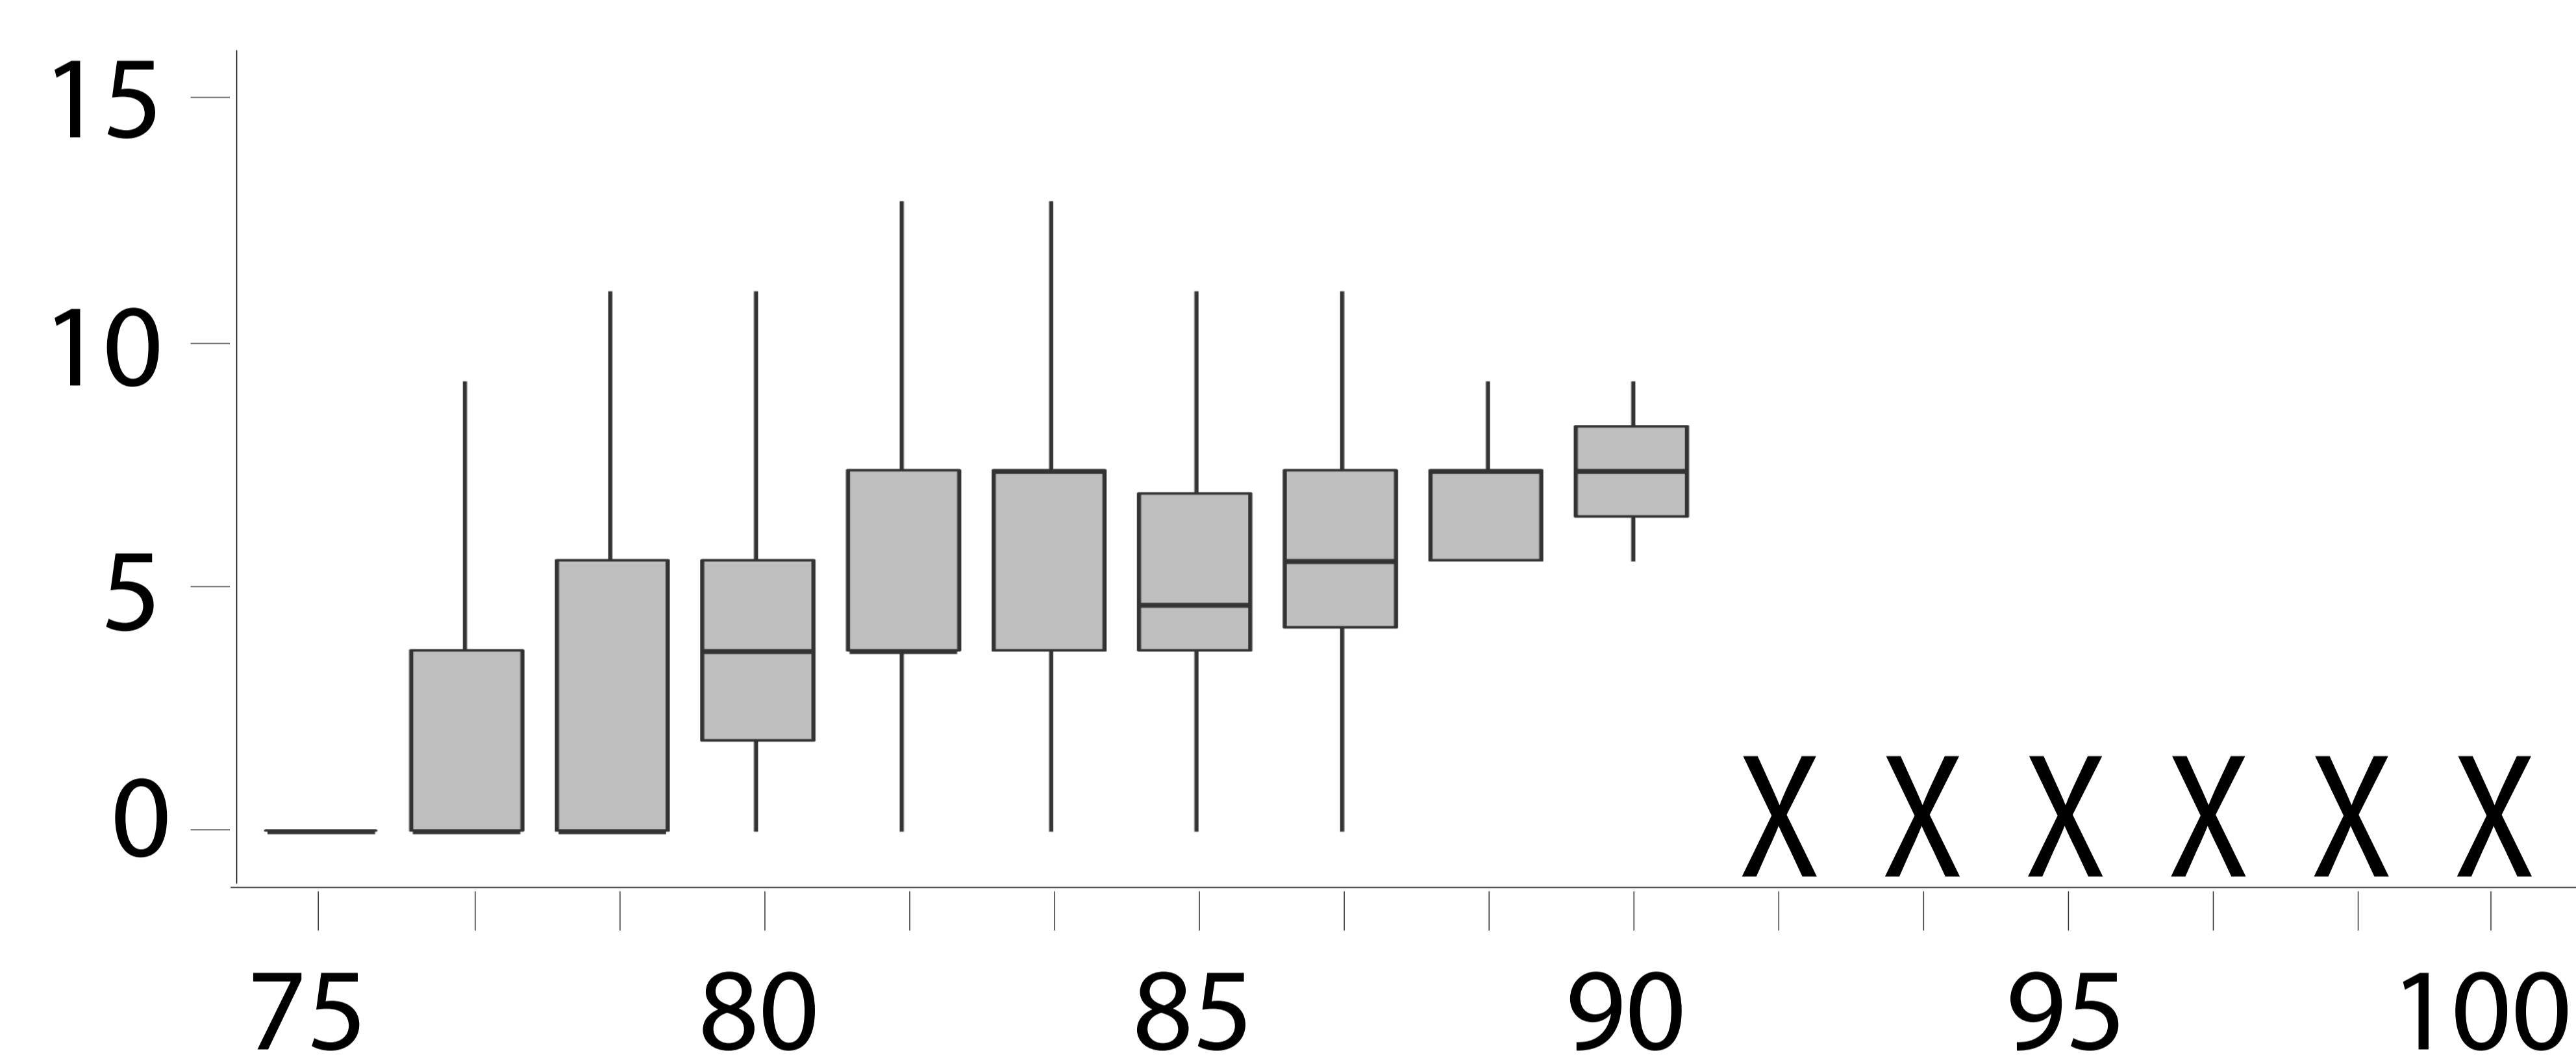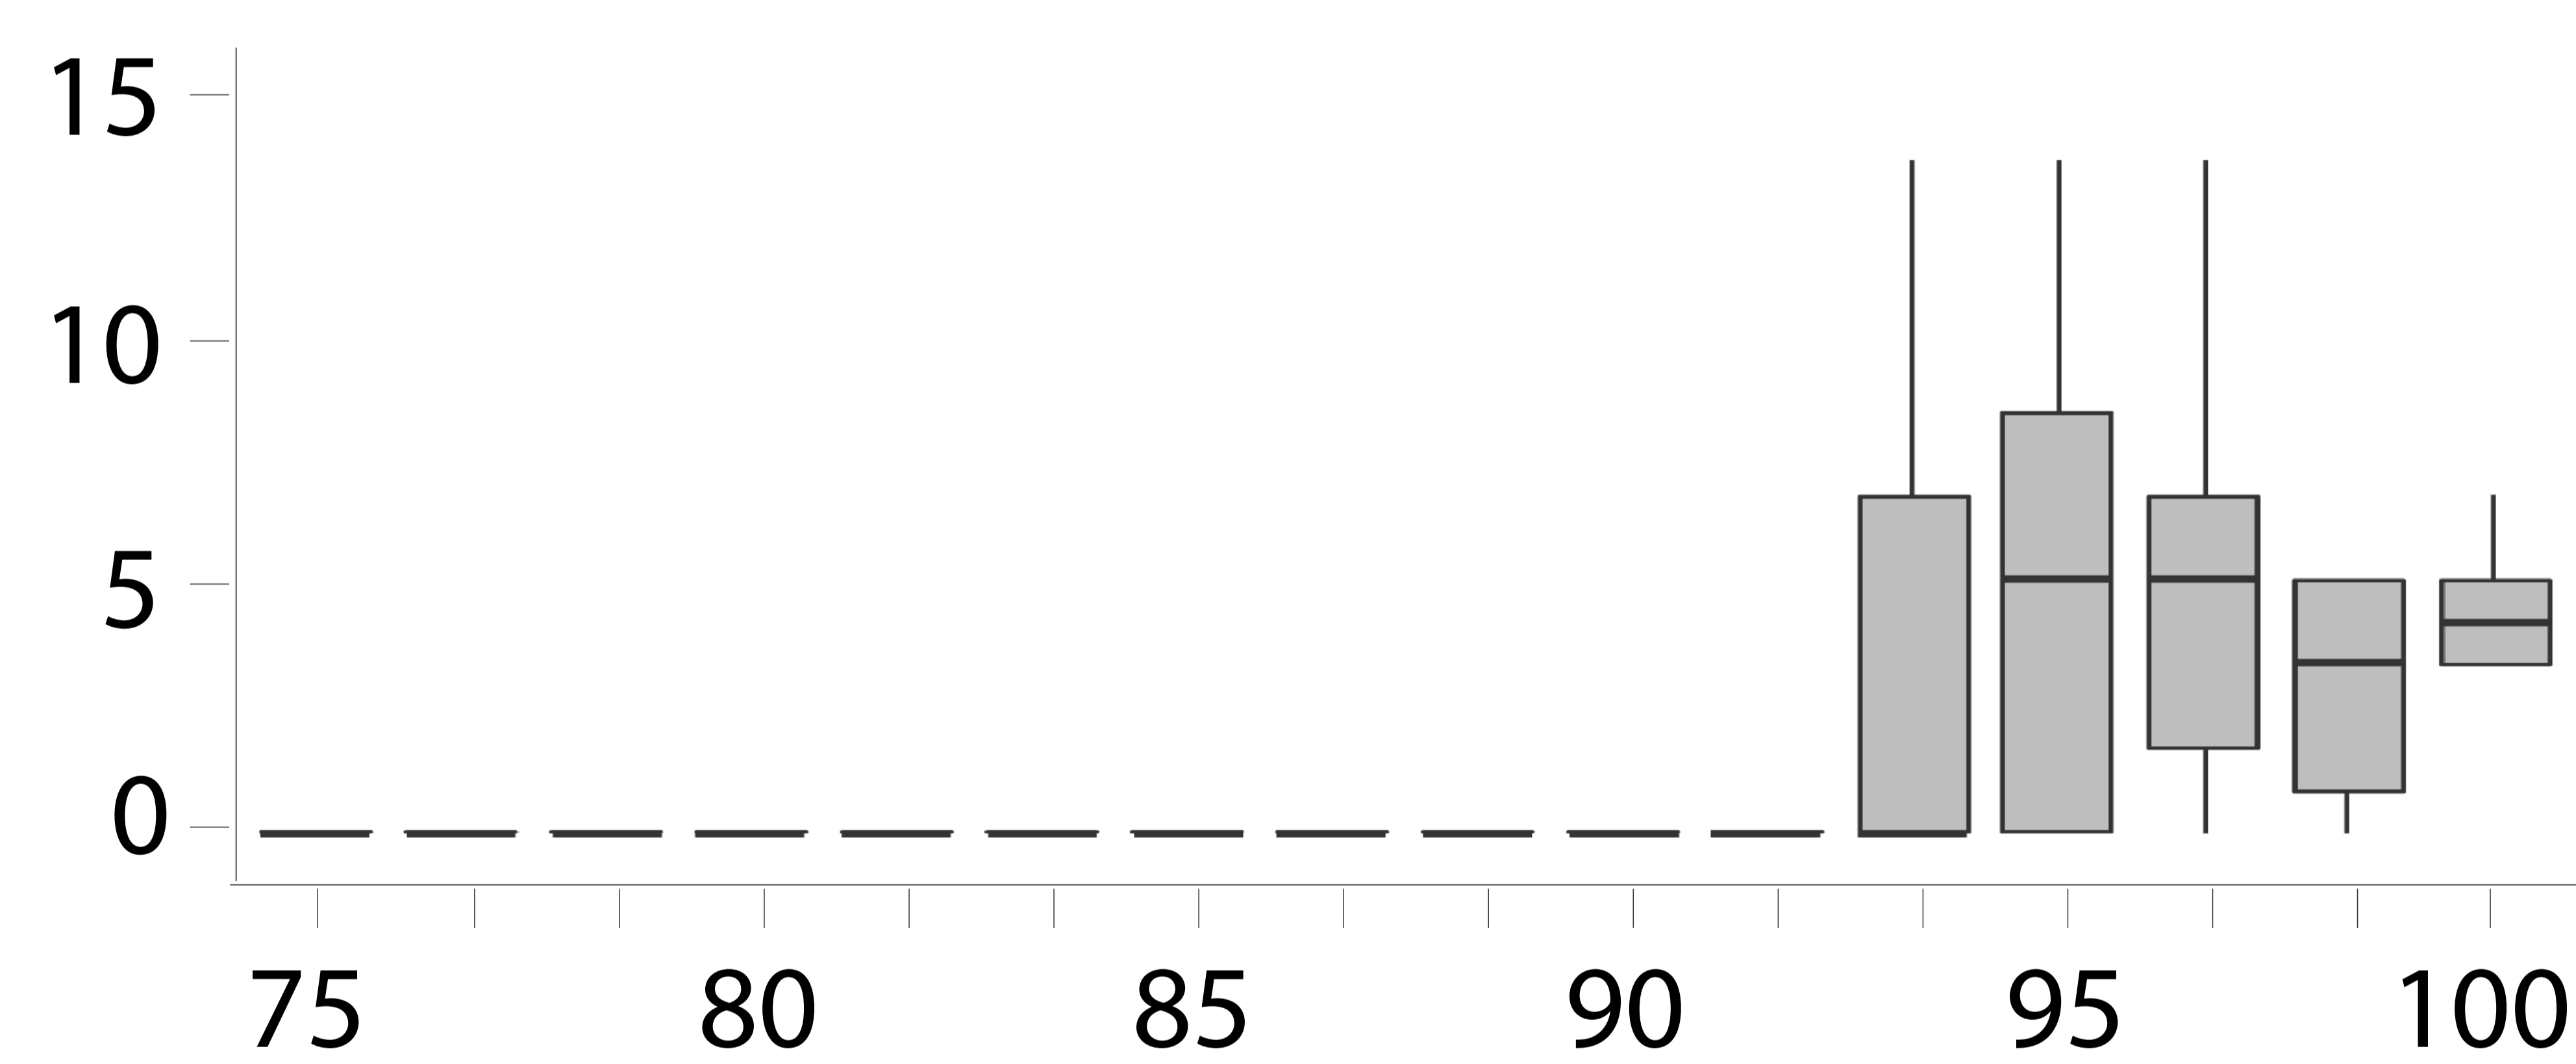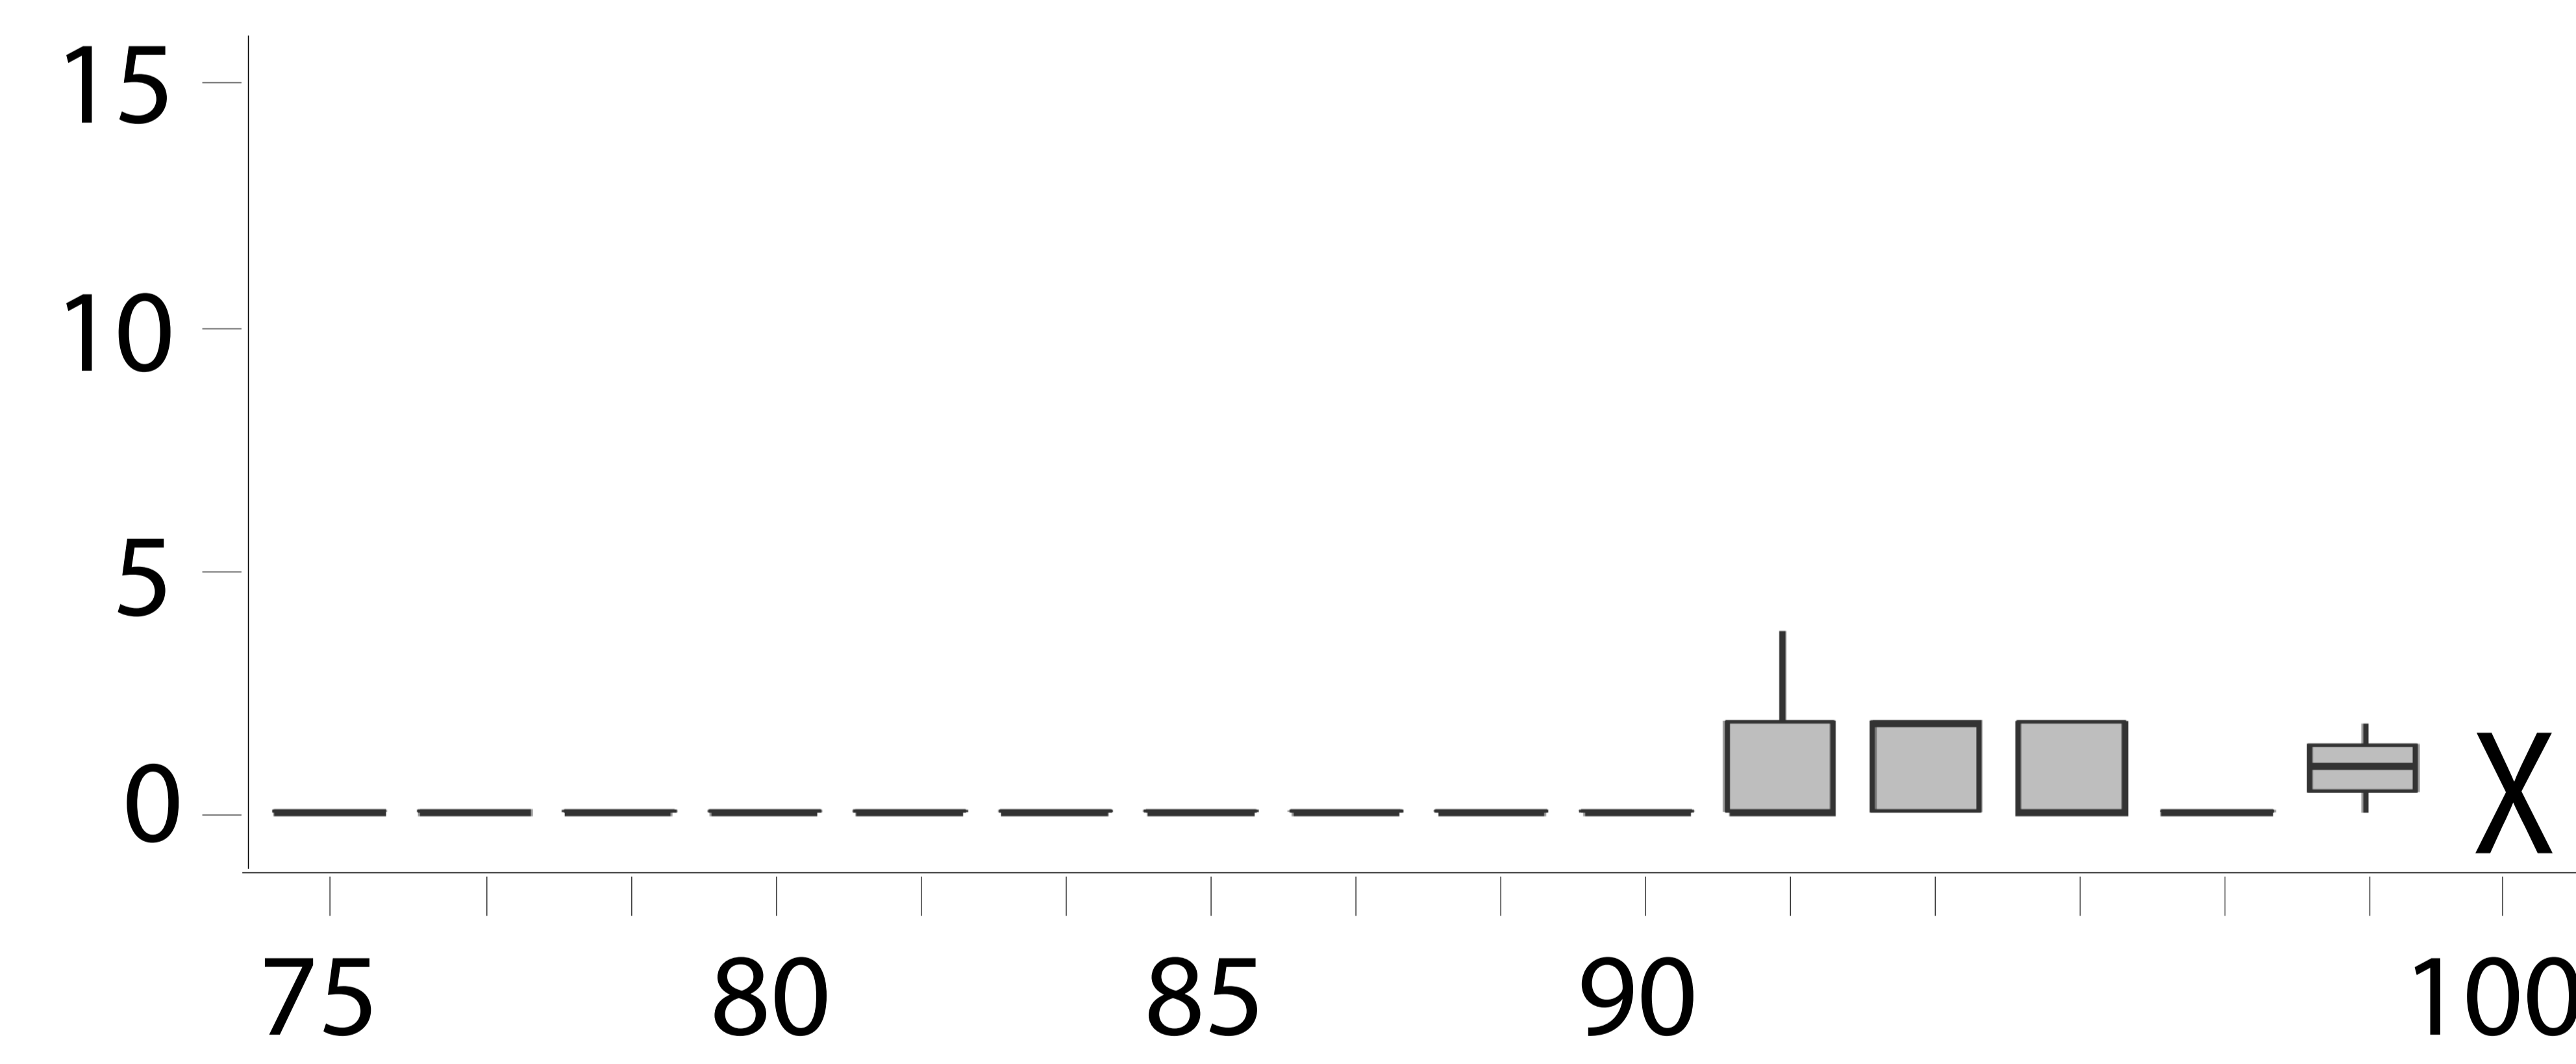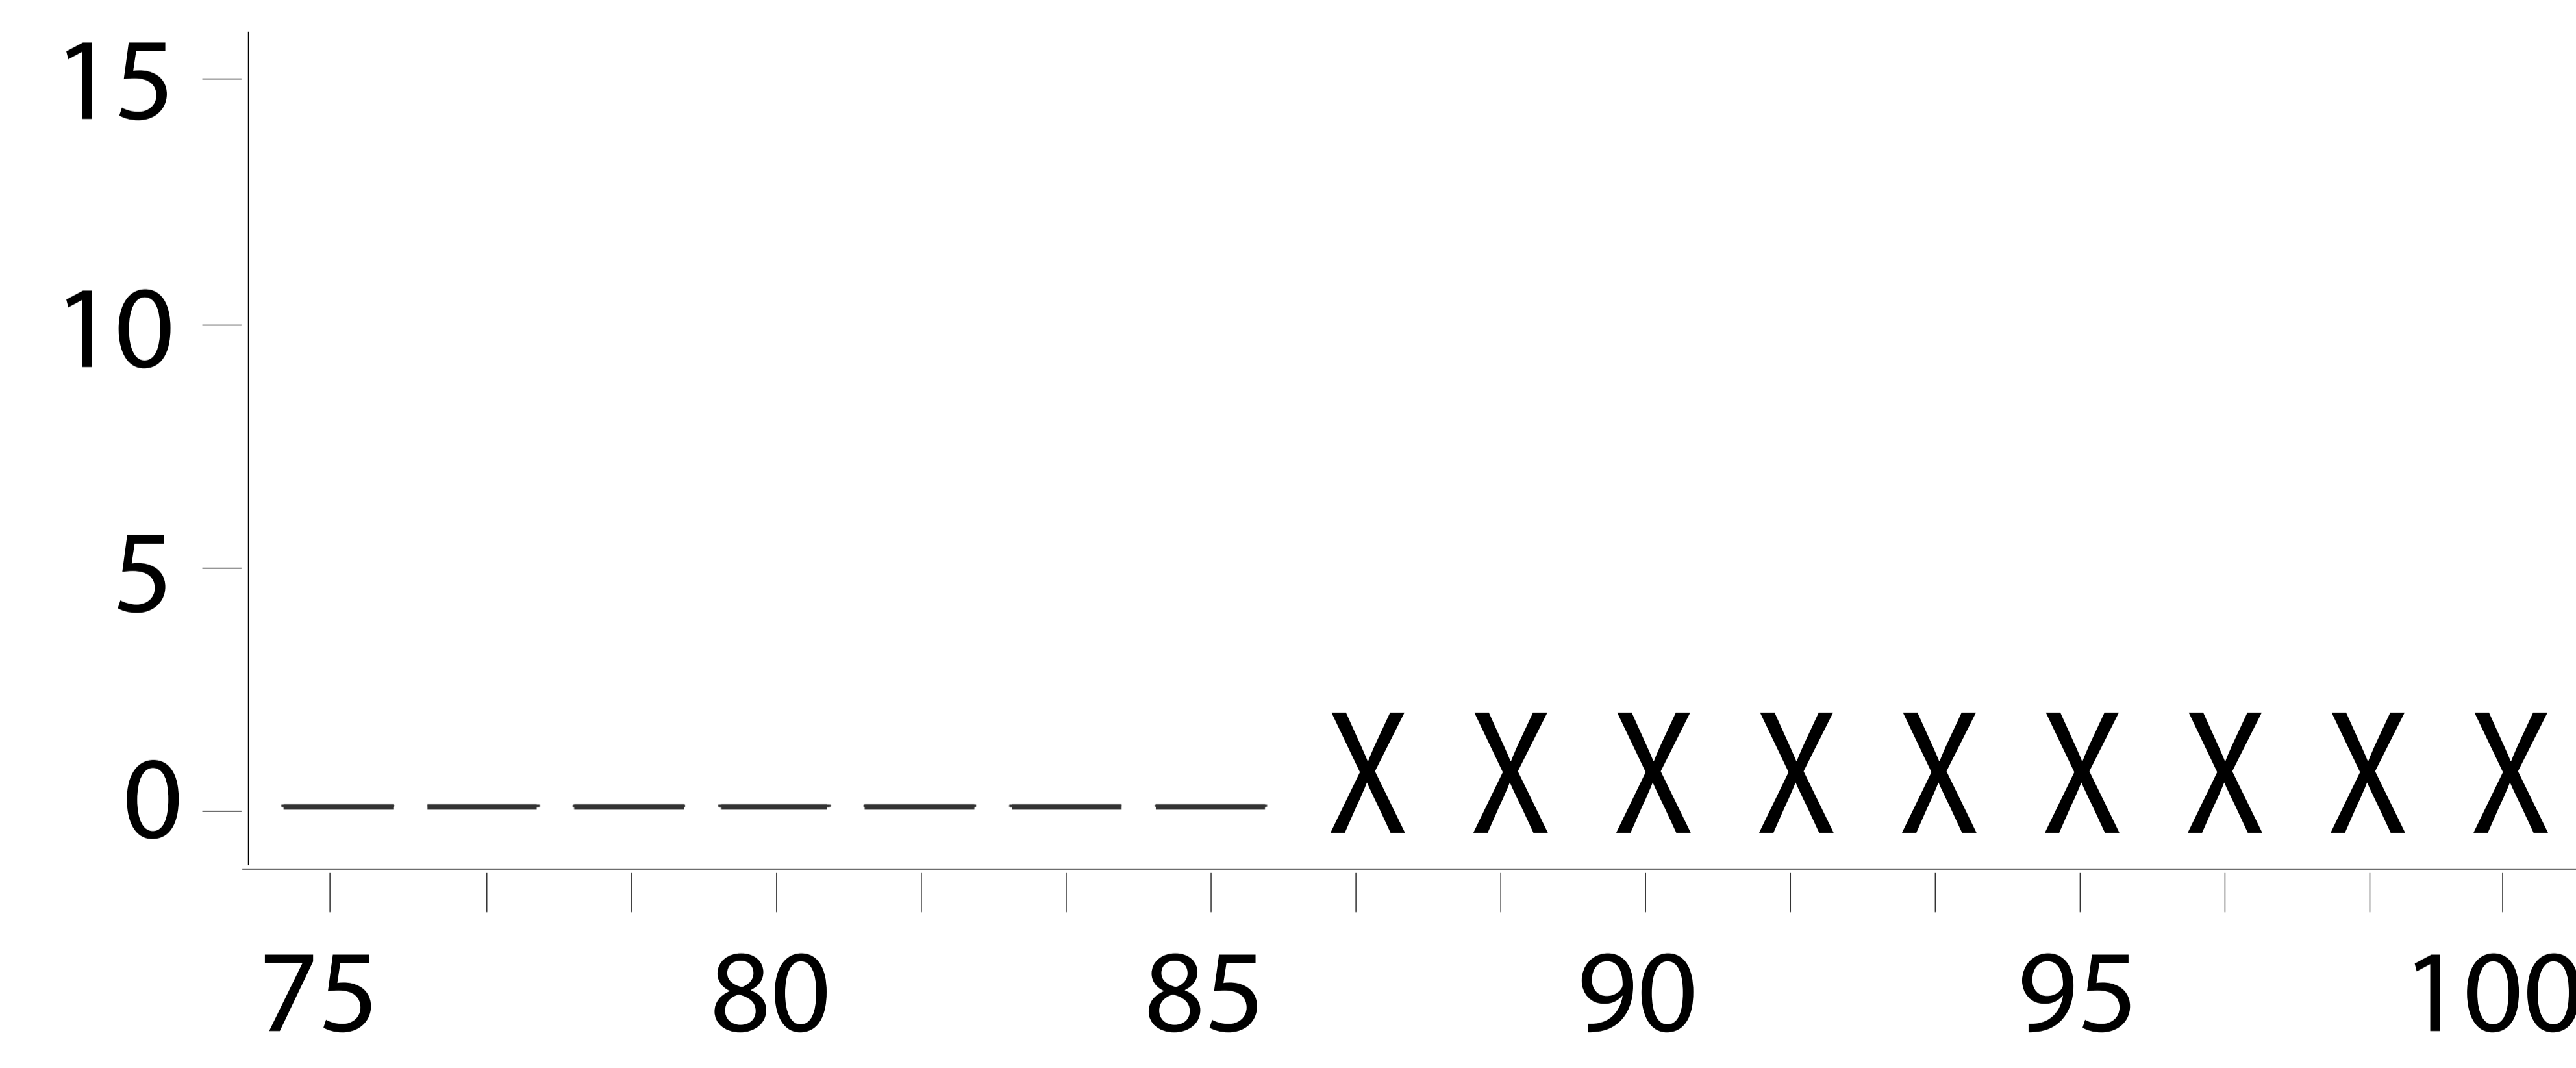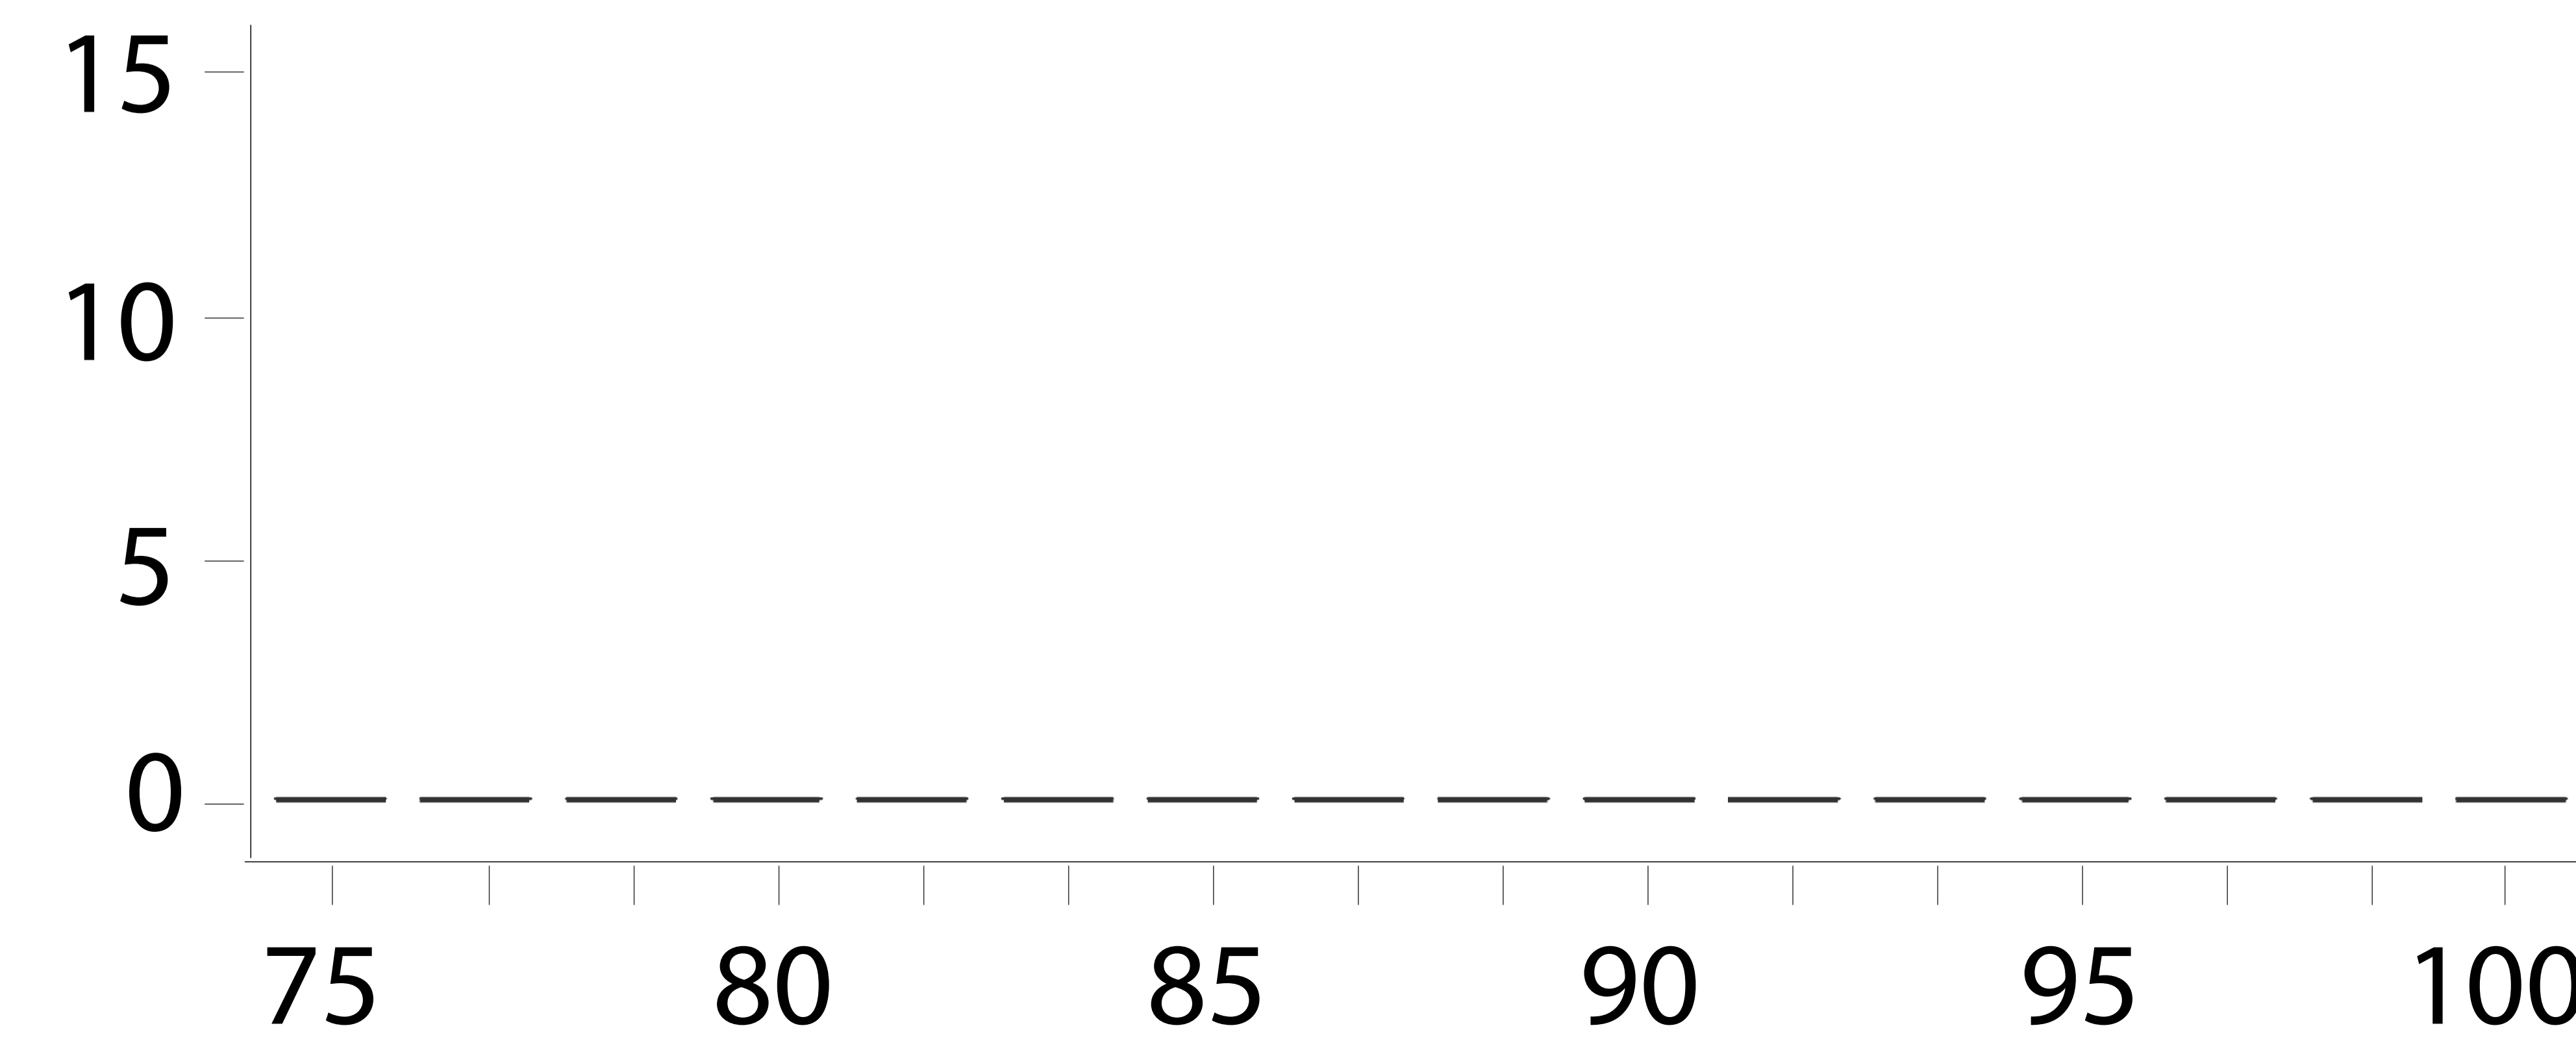

C

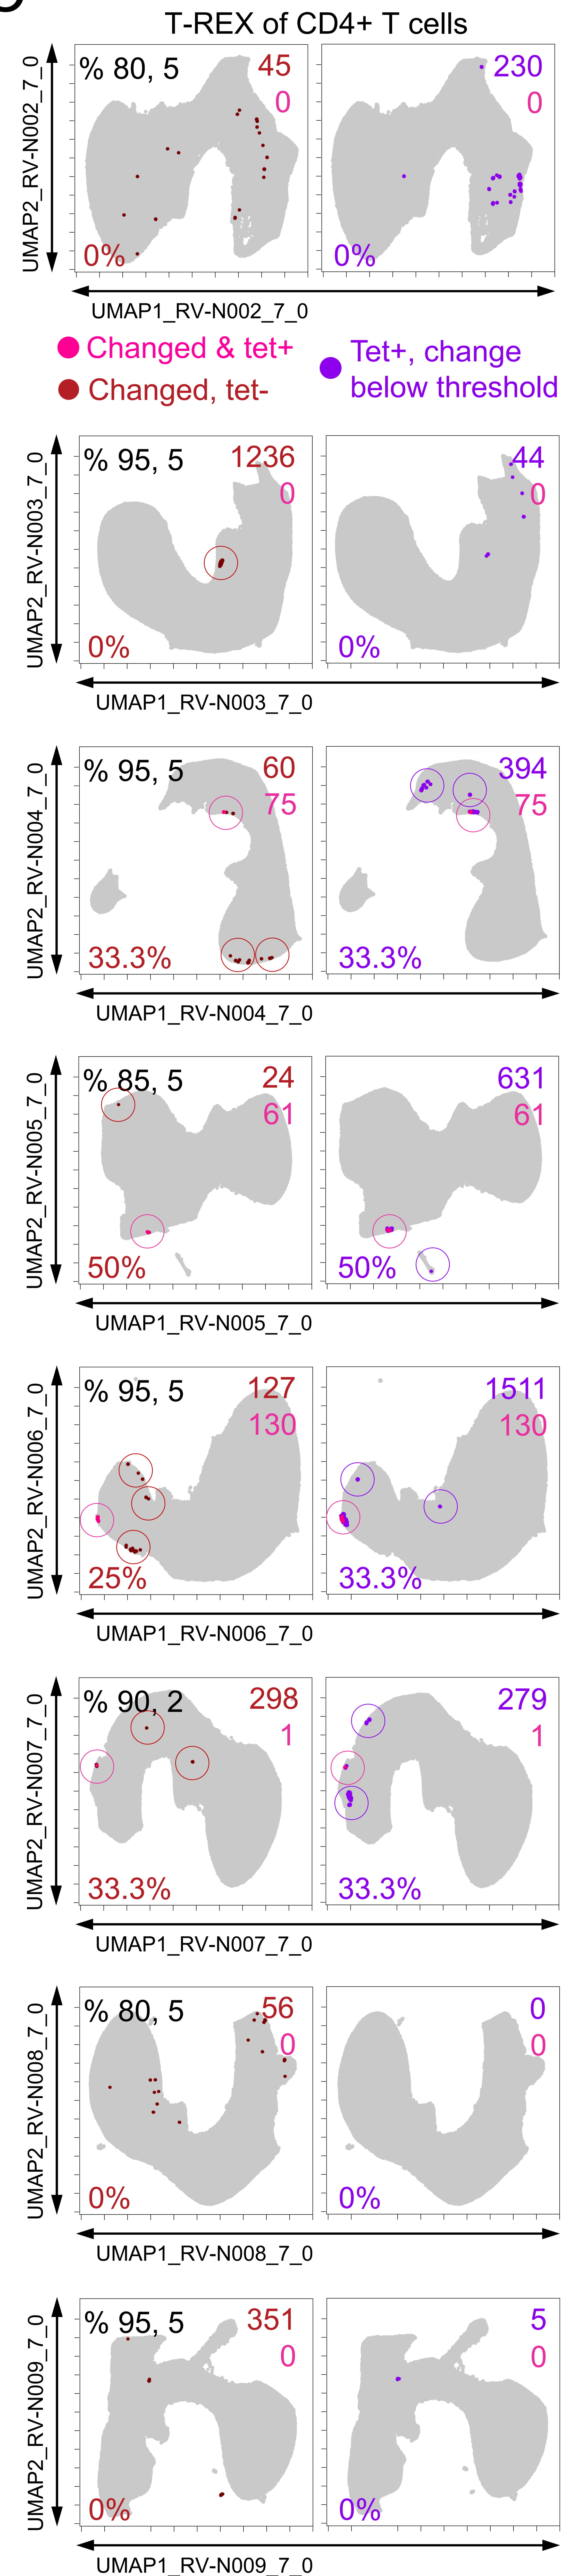

Supplement: media-1.pdf [file media-1.pdf]
